# Recapitulate Human Cardio-pulmonary Co-development Using Simultaneous Multilineage Differentiation of Pluripotent Stem Cells

Wai Hoe Ng<sup>1</sup>, Elizabeth K. Johnston<sup>1</sup>, Jun Jie Tan<sup>2</sup>, Jacqueline M. Bliley<sup>1,3</sup>, Adam W. Feinberg<sup>1,3</sup>, Donna B. Stolz<sup>4</sup>, Ming Sun<sup>4</sup>, Finn Hawkins<sup>5</sup>, Darrell N. Kotton<sup>5</sup>, Xi Ren<sup>†,1</sup>

## **Authors' affiliation:**

<sup>1</sup> Department of Biomedical Engineering, Carnegie Mellon University, Pittsburgh, Pennsylvania, USA

<sup>2</sup> Advanced Medical and Dental Institute, Universiti Sains Malaysia, Penang, Malaysia.

<sup>3</sup> Department of Materials Science and Engineering, Carnegie Mellon University, Pittsburgh, Pennsylvania, USA

<sup>4</sup> Center for Biologic Imaging, University of Pittsburgh, Pittsburgh, Pennsylvania, USA

<sup>5</sup> Center for Regenerative Medicine of Boston University and Boston Medical Center, Boston, MA 02118, USA

<sup>†</sup> Correspondence

## **Authors of correspondence:**

Xi Ren, PhD

Carnegie Mellon University, Scott Hall 4N111

5000 Forbes Avenue, Pittsburgh, PA 15213

Telephone: 1-412-268-7485

Email: [xiren@cmu.edu](mailto:xiren@cmu.edu)

## **Abstract**

The extensive crosstalk between the developing heart and lung is pivotal for their proper morphogenesis and maturation. However, there remains a lack of model systems for investigating the critical cardio-pulmonary mutual interaction during human embryogenesis. Here, we reported a novel stepwise strategy for directing simultaneous induction of both mesoderm-derived cardiac and endoderm-derived lung epithelial lineages within a single differentiation of human pluripotent stem cells (hPSCs) via temporal specific tuning of WNT and TGF- $\beta$  signaling in the absence of exogenous growth factors. Using 3D suspension culture, we established concentric cardio-pulmonary micro-Tissues ( $\mu$ Ts), and observed expedited alveolar maturation in the presence of cardiac accompany. Upon withdrawal of WNT agonist, the cardiac and pulmonary components within each dual-lineage  $\mu$ T effectively segregated from each other with concurrent initiation of cardiac contraction. We expect our multilineage differentiation model to offer an experimentally tractable system for investigating human cardio-pulmonary interplay and tissue boundary formation during embryogenesis.

## Introduction

Human embryogenesis is a highly orchestrated process that requires delicate coordination between organs originated from different germ layers. Being the two main organs within the chest cavity, the mesoderm-derived heart and endoderm-derived lung have extensive mutual interaction that is essential for their proper morphogenesis.<sup>1-4</sup> During mouse embryonic development, WNT derived from the second heart field induces specification of pulmonary endoderm, which in turn secretes SHH that signals back to the heart and regulates proper atrial septation.<sup>4-6</sup> This inter-lineage crosstalk is partly mediated by the multipotent mesodermal progenitors located between the developing heart and lung, which have the potential of lineage contribution to pulmonary endothelium, pulmonary smooth muscle and cardiomyocytes.<sup>1</sup> However, the translatability of findings derived from rodent models to the understanding of developmental interplay between human cardio-pulmonary systems remains unclear. There is, therefore, a critical need of experimentally tractable systems for investigating human cardio-pulmonary co-development during organogenesis.

Much work has been done for directed differentiation of hPSCs into either cardiomyocytes,<sup>7-13</sup> or pulmonary epithelium,<sup>14-21</sup> which often utilizes stepwise differentiation strategies that recapitulate key developmental signaling events. To recapitulate cardiogenesis, hPSCs were sequentially specified into mesoderm, cardiac mesoderm, and then NKX2.5<sup>+</sup> cardiac progenitors.<sup>7-13</sup> For pulmonary induction, hPSCs went through stages corresponding to definitive endoderm and anterior foregut endoderm, and then became NKX2.1<sup>+</sup> lung epithelial progenitors.<sup>14-21</sup> Despite significant contribution of these models to the mechanistic understanding of human heart and lung organogenesis, they generally focused on one organ parenchyma at a time. It remains challenging to model and investigate multi-organ co-development within a single differentiation of hPSCs, especially when the organs of interest are derived from different germ layers, as is the case for the heart and lung.

Comparison of existing protocols for single-lineage cardiac and pulmonary differentiation from hPSCs indicates shared regulators despite their distinct germ-layer origin. Firstly, both endodermal and mesodermal specification is facilitated by the inhibition of insulin and phosphoinositide 3-kinase signaling,<sup>7,22,23</sup> and can be induced by a similar set of paracrine factors, including WNT, BMP and TGF- $\beta$ .<sup>13,17,24</sup> It is the quantitative combination of these signaling that determines endoderm versus mesoderm bifurcation.<sup>13,24,25</sup> This is in consistency with the shared primitive streak origin of both germ layers during gastrulation.<sup>26-28</sup> Secondly, WNT inhibition not only facilitates the transition from definitive endoderm to anterior foregut endoderm,<sup>24,29</sup> but also promotes cardiac mesoderm emergence.<sup>7,30-33</sup> Lastly, retinoic acid (RA) signaling is required for the induction and maturation of both cardiac and pulmonary progenitors.<sup>15,16,23,34,35</sup> These common paracrine regulation of paralleled cardiac and pulmonary specification is consistent with their close spatial coordinates within the embryonic body planning, as demonstrated by shared HOX genes expression and functional requirement.<sup>36-38</sup>

In this study, we described a stepwise, growth-factor-free protocol for simultaneous induction of cardiac and pulmonary progenitors from a single culture of hPSCs. This is accomplished by initial co-induction of mesoderm and definitive endoderm mixture, followed by their concurrent specification into cardiac (NKX2.5<sup>+</sup>) and lung (NKX2.1<sup>+</sup>) progenitors, respectively, using the same sets of small molecule cocktails modulating WNT and TGF- $\beta$  signaling in a temporal specific manner. Using 3D suspension culture with continuing WNT activation, we engineered pulmonary-centered, cardio-pulmonary micro-Tissues ( $\mu$ Ts), and demonstrated the accompanying cardiac lineage as an essential cellular niche that promoted effective alveolar maturation. Finally, following the withdrawal of WNT agonist, each concentric cardio-pulmonary  $\mu$ T reorganized and ultimately segregated into cardiac-only and pulmonary-only  $\mu$ Ts. This work therefore offers an effective hPSC-based model for investigating cardio-pulmonary co-development and tissue segregation during human embryogenesis.

## Results

### Simultaneous induction of cardiac and pulmonary progenitors

Building on existing protocols on cardiac<sup>7-13</sup> and lung<sup>14-19,39</sup> differentiation from hPSCs, a stepwise differentiation strategy was developed to enable simultaneous specification of both lineages within a single culture of hPSCs (Fig. 1a). Firstly, a balanced mesodermal and endodermal induction was achieved via fine-tuning of WNT

05 activation in the absence of  
 06 exogenous supplementation  
 07 of insulin, TGF- $\beta$  and BMP4  
 08 (Stage-1). Then, a combined  
 09 inhibition of WNT and TGF- $\beta$   
 10 signaling initiated the  
 11 specification of the co-  
 12 induced mesoderm and  
 13 endoderm towards cardiac  
 14 and pulmonary specification,  
 15 respectively (Stage-2).  
 16 Lastly, reactivation of WNT  
 17 signaling in the presence of  
 18 retinoic acid (RA) led to  
 19 concurrent emergence of  
 20 NKX2.5<sup>+</sup> cardiac and  
 21 NKX2.1<sup>+</sup> lung progenitors  
 22 (Stage-3).

23  
 24 WNT signaling is required for  
 25 mesodermal and  
 26 endodermal specification in  
 27 dose-dependent manner  
 28 during embryogenesis as  
 29 well as hPSC  
 30 specification.<sup>7,13,40,41</sup> Using a  
 31 human induced pluripotent  
 32 stem cell (hiPSC) line, BU3  
 33 NKX2.1<sup>GFP</sup>; SFTPC<sup>tdTomato</sup>  
 34 (BU3-NGST), we examined  
 35 the possibility of co-inducing  
 36 mesodermal and definitive  
 37 endodermal specification  
 38 solely via the modulation of  
 39 WNT signaling using a  
 40 GSK3 $\beta$  inhibitor  
 41 (CHIR99021, hereafter  
 42 abbreviated as CHIR)  
 43 without the addition of  
 44 exogenous growth factors  
 45 (e.g. Activin A and BMP4).  
 46 BU3-NGST were treated  
 47 with different concentrations  
 48 of CHIR at 4, 7 and 10  $\mu$ M  
 49 for 48 hrs in mTESR1  
 50 medium, followed by  
 51 incubation in growth factor-  
 52 free differentiation medium  
 53 (based on RPMI1640 and B-  
 54 27 minus insulin)  
 55 (Supplementary Fig. 1a).  
 56 Towards the end of germ  
 57 layer induction (Stage-1),  
 58 we detected co-existence of  
 59 both definitive endodermal  
 60 (SOX17<sup>+</sup>) and mesodermal

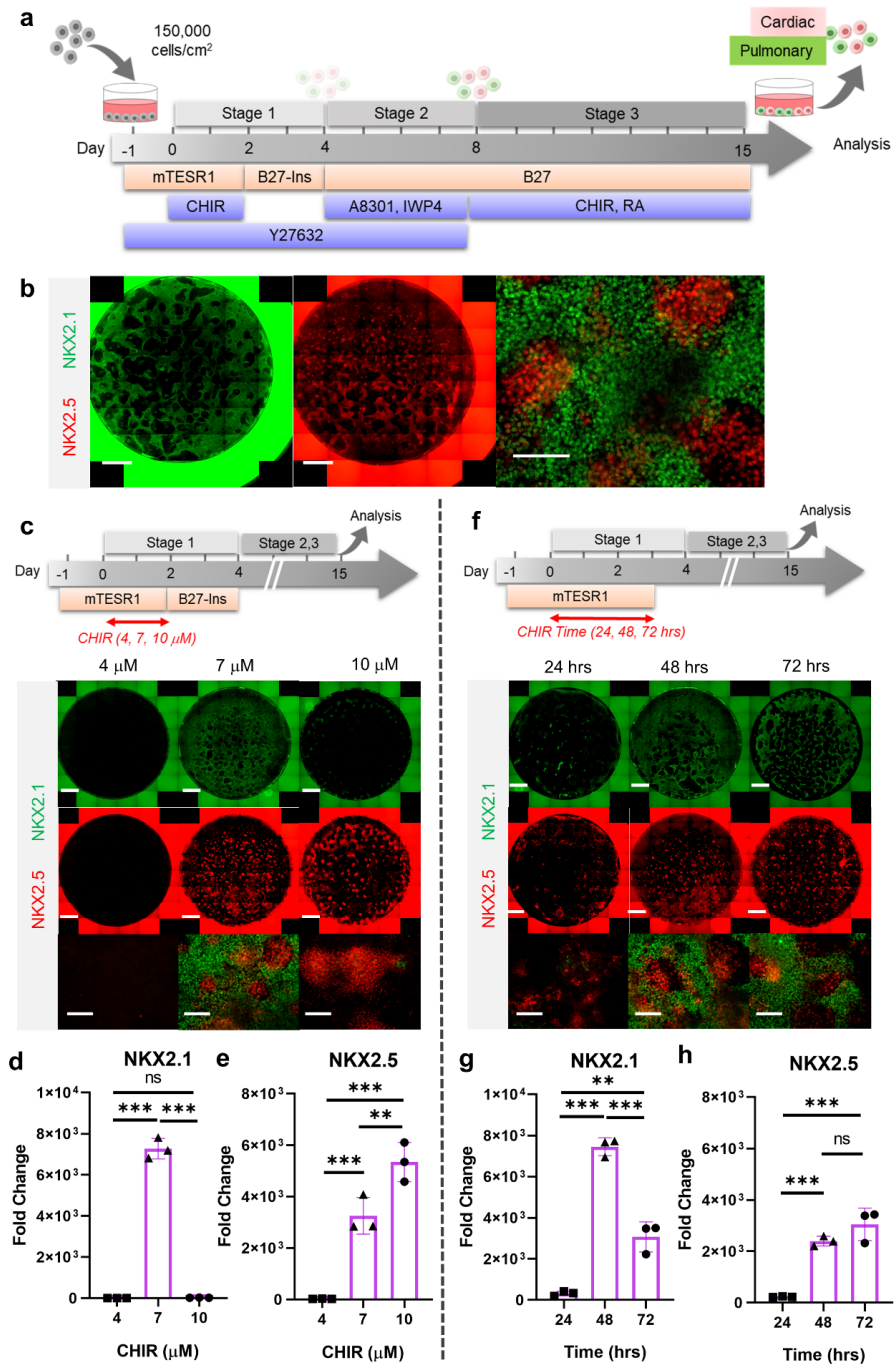

**Figure 1: Stepwise cardio-pulmonary co-differentiation from hiPSCs using chemical defined, growth factor-free protocol.** (a) Schematic diagram showing the overall differentiation strategy. (b) Immunofluorescence (IF) showing staining of lung (NKX2.1<sup>+</sup>) and cardiac (NKX2.5<sup>+</sup>). (c) IF (d,e) and quantitative PCR (qPCR) analysis of the induction of lung and cardiac progenitors on Day-15 of differentiation. (c-e) The effects of different CHIR concentrations during Stage-1 of differentiation. Fold change over hiPSCs (d) NKX2.1 (n = 3 each; 4 vs. 7, p < 0.001; 7 vs. 10, p < 0.001; 4 vs. 10, p = 0.9993) and (e) NKX2.5 (n = 3 each; 4 vs. 7, p < 0.001; 7 vs. 10, p = 0.0053; 4 vs. 10, p = 0.0015). (f-h) The effects of different exposure time of CHIR (7  $\mu$ M) treatment during the first 2 days of differentiation. qPCR analysis of (g) NKX2.1 (n = 3 each; 24 vs. 48, p < 0.001; 48 vs. 72, p < 0.001; 24 vs. 72, p < 0.001) and (h) NKX2.5 (n = 3 each; 24 vs. 48, p < 0.001; 48 vs. 72, p = 0.1503; 24 vs. 72, p < 0.001). Scale bar = 500  $\mu$ m for whole well scan; Scale bar = 125  $\mu$ m for 20X images. All data are mean  $\pm$  SD. \*p < 0.05; \*\*p < 0.01; \*\*\*p < 0.001.

61 progenitors (MIXL1<sup>+</sup> and NCAM1<sup>+</sup>), as well as the wide-spread expression of pan-mesendoderm marker  
62 (MIXL1) (Supplementary Fig. 1b). In addition, definitive endoderm co-expressed both FOXA2 and SOX17  
63 (Supplementary Fig. 1c). This observation was further confirmed by gene expression analysis of FOXA2,  
64 SOX17 and NCAM1 (Supplementary Fig. 1d), which together suggests that 7  $\mu$ M CHIR drives balanced  
65 endoderm and mesoderm induction from hPSCs, while further elevation of CHIR dosage selectively favors  
66 mesodermal specification.

67  
68 To specify the co-induced mesoderm and endoderm towards cardiac and pulmonary lineages, respectively,  
69 the Day-4 cells were treated with TGF- $\beta$  inhibitor (A8301)<sup>35,42,43</sup> and WNT inhibitor (using IWP4)<sup>7,15</sup> for 4 days  
70 (Stage-2, Day-5 to Day-8), followed by ventralization cocktail consisting of CHIR and RA (essential for lung  
71 progenitor specification) for 7 days to Day-15 (Stage 3) (Fig. 1a,b).<sup>35,42,43</sup> Consistent with CHIR-dependent  
72 germ layer induction (Supplementary Fig. 1), the efficiency of cardio-pulmonary specification was tightly  
73 regulated by CHIR dosage. We found that on Day-15, cells pre-exposed to CHIR (7  $\mu$ M) during Stage-1 were  
74 able to give rise to robust co-induction of both cardiac (NKX2.5<sup>+</sup>) and pulmonary (NKX2.1<sup>+</sup>) progenitors (Fig.  
75 1c,d,e). In comparison, cells pre-treated with high-CHIR (10  $\mu$ M) differentiated mainly into the cardiac lineage;  
76 while low-CHIR (4  $\mu$ M) failed to drive effective differentiation of either lineage (Fig. 1c,d,e). We further  
77 confirmed the applicability of our cardio-pulmonary co-induction protocol to another independent hiPSC line  
78 (BU1) (Supplementary Fig. 2).

79  
80 The action of CHIR treatment on hPSC differentiation depends on not only its dosage but also the length of  
81 exposure time.<sup>44,45</sup> We evaluated the efficiency of cardio-pulmonary induction following exposure to CHIR (7  
82  $\mu$ M) for different time spans (24, 48 and 72 hrs), and found that extended CHIR exposure for 48 or 72 hrs was  
83 required to induce robust cardio-pulmonary programs (Fig. 1f). Specifically, CHIR favored cardiac specification  
84 in a time-dependent manner and plateaued at 48 hrs of treatment (Fig. 1h); while the induction of pulmonary  
85 program peaked at 48 hrs of CHIR treatment (Fig. 1g) and declined with further extension of the treatment.  
86 Based on these observations, for all subsequent experiments, we used 48-hr treatment of CHIR (7  $\mu$ M) during  
87 Stage-1 of the co-differentiation program. Furthermore, we showed that maintaining hPSCs in mTESR1 Plus  
88 during the initial CHIR treatment appeared to be critical for enabling effective cardio-pulmonary differentiation  
89 (Supplementary Fig. 3), as compared to using RPMI1640 supplemented with B-27 minus insulin as the basal  
90 medium during CHIR treatment.

91  
92 Exogenous activation of TGF- $\beta$  and BMP signaling during the very initial steps of hPSC specification has been  
93 widely utilized for cardiac<sup>9,13,41</sup> and pulmonary<sup>15,19,23,42,46</sup> specification from hPSCs. Here, we investigated how  
94 exogenous and endogenous TGF- $\beta$  and BMP signaling regulates cardio-pulmonary induction during germ  
95 layer induction (Stage-1). TGF- $\beta$  inhibition (using A8301, Day-2 to Day-4) immediately following CHIR  
96 treatment abolished both cardiac and pulmonary induction; while TGF- $\beta$  activation through Activin A  
97 supplementation (Day-2 to Day-4) led to pulmonary-only differentiation outcome (Fig. 2a,b,c). This suggests  
98 the requirement of endogenous TGF- $\beta$  for cardio-pulmonary induction and that high-level TGF- $\beta$  activation  
99 favors pulmonary instead of cardiac induction. In parallel, BMP inhibition (using DMH-1) during the same time  
00 period compromised cardiac induction and mildly reduced pulmonary specification; while exogenous BMP4  
01 supplementation enhanced cardiac induction but inhibited pulmonary specification (Fig. 2d,e,f). This indicates  
02 that endogenous BMP signaling is primarily required for cardiac induction and that exogenous augmentation  
03 of BMP signaling further favors the cardiac lineage at the expense of the pulmonary lineage.

### 04 **Shared signaling for cardio-pulmonary co-differentiation from germ-layer progenitors**

05  
06 In previous single-lineage hPSC differentiation studies, TGF- $\beta$  and WNT inhibition is known to promote  
07 pulmonary specification from definitive endoderm<sup>15,19,35,42,43,46</sup> as well as the induction of cardiac mesoderm.<sup>7</sup>  
08 Here, we examined how combined inhibition of both TGF- $\beta$  (using A8301) and WNT (using IWP4) during Day-4  
09 to Day-8 (Supplementary Fig. 4a) regulates cardio-pulmonary specification from germ-layer progenitors  
10 established in Stage-1. We found that combined TGF- $\beta$  and WNT inhibition enhanced both cardiac and  
11 pulmonary specification, with TGF- $\beta$  inhibition having a more profound effect on the cardiac lineage  
12 (Supplementary Fig. 4b,c,d). Our finding suggests shared signaling requirement for lung and heart induction  
13 from their respective germ-layer progenitors, which is consistent with their close spatial coordinates within the  
14 embryonic body planning.<sup>36-38</sup>



16 In both mouse and human PSC  
 17 differentiation models, exogenous  
 18 BMP4 has been shown to be  
 19 crucial for ventralization of the  
 20 foregut endoderm to give rise to  
 21 NKX2.1<sup>+</sup> lung progenitors.<sup>15,16,47</sup>  
 22 Here in our study, we observed  
 23 effective cardio-pulmonary co-  
 24 differentiation in the absence of  
 25 exogenous BMP4 during  
 26 ventralization (Stage 3) (Fig. 1b).  
 27 To address this discrepancy, we  
 28 investigated how exogenous  
 29 introduction of BMP4 during  
 30 ventralization regulated the  
 31 emergence of cardiac and  
 32 pulmonary progenitors  
 33 (Supplementary Fig 5a).  
 34 Intriguingly, there was no  
 35 significant differences observed at  
 36 protein and gene expression level  
 37 of NKX2.1 and NKX2.5 comparing  
 38 ventralization in the presence and  
 39 absence of exogenous BMP4  
 40 (Supplementary Fig. 5b,c,d).  
 41 Nonetheless, endogenous BMP4  
 42 was indeed required during this  
 43 stage of differentiation, as  
 44 inhibition of BMP4 using DMH1  
 45 significantly compromising the  
 46 induction of both NKX2.1 and  
 47 NKX2.5 (Supplementary Fig.  
 48 5b,c,d).

### 3D suspension culture platform for alveolar induction

52 To examine whether NKX2.1<sup>+</sup> lung  
 53 progenitors derived from the  
 54 cardio-pulmonary co-induction  
 55 protocol (Fig. 1a) possess the  
 56 ability to mature into alveolar type  
 57 2 (AT2) epithelial cells, the Day-15  
 58 cells were trypsinized and re-  
 59 plated into the ultra-low adhesion  
 60 plate for 3D suspension culture  
 61 (Fig. 3a), and exposed to alveolar  
 62 maturation medium containing  
 63 CHIR, KGF, Dexamethasone, 8-  
 64 bromoadenosine 3', 5'-cyclic  
 65 monophosphate (cAMP activator) and IBMX (CKDCI).<sup>42,46,48</sup>

66 Upon transition from 2D to 3D suspension culture  
 67 in CKDCI medium, the co-induced cardio-pulmonary progenitors self-assembled into pulmonary-centered,  
 68 concentric, dual-lineage  $\mu$ Ts during the overnight culture (Fig. 3b). Following 3 days of 3D suspension culture  
 69 in CKDCI medium, effective AT2 maturation was observed in the cardio-pulmonary  $\mu$ Ts as indicated by robust  
 70 SFTPC<sup>TdTomato</sup> fluorescence (Fig. 3c), which sustained up to Day-29 (2 weeks in alveolar maturation,  
 71 Supplementary Fig. 7a,b). Furthermore, we confirmed lamellar body presence within the induced AT2 cells  
 (Supplementary Fig. 7c). As a control, we cultured Day-15 cardio-pulmonary progenitors on top of the transwell

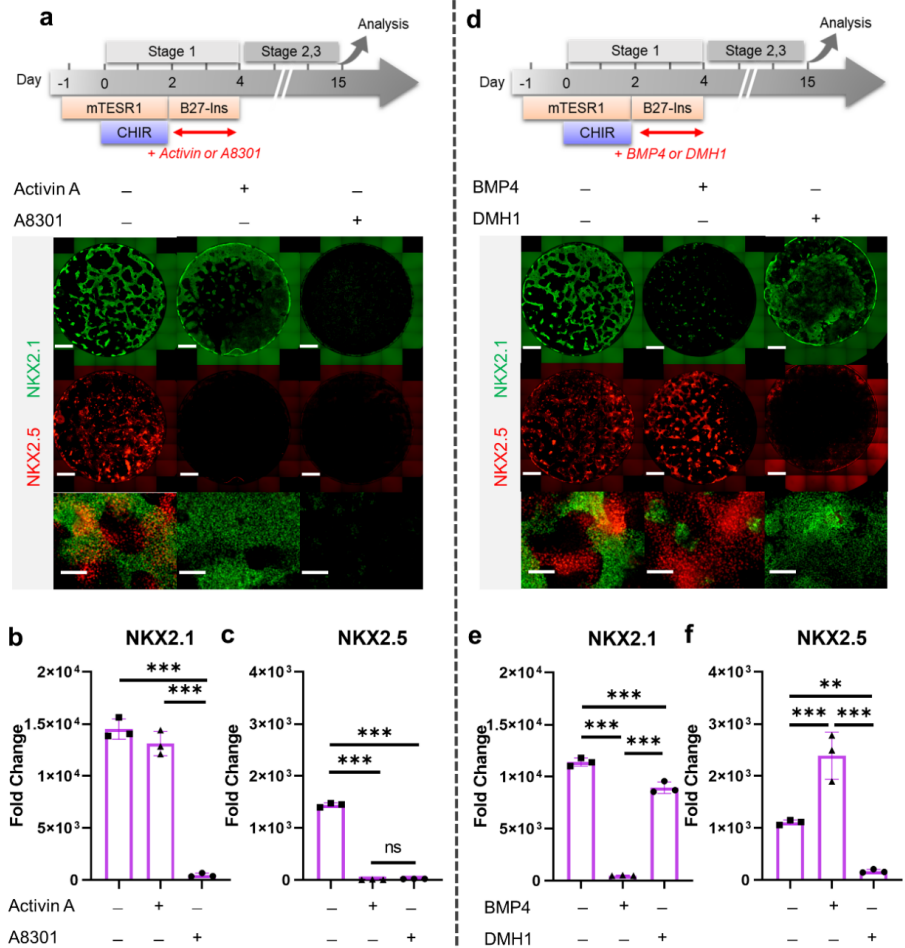

**Figure 2: The effect of TGF- $\beta$  and BMP signaling during Stage-1 of co-differentiation on cardio-pulmonary induction.** IF (a,d) and qPCR (b,c,e,f) analysis of the induction of lung (NKX2.1<sup>+</sup>) and cardiac (NKX2.5<sup>+</sup>) progenitors on Day 15 of differentiation (a-c) The effects of exogenous TGF- $\beta$  activation (Activin A, 20 ng/mL) or its inhibition (A8301, 1  $\mu$ M). Fold change over hPSCs for (b) NKX2.1 (n = 3 each; Activin A<sup>-</sup>/A8301<sup>-</sup> vs. Activin A<sup>+</sup>/A8301<sup>-</sup>, p < 0.001; Activin A<sup>-</sup>/A8301<sup>-</sup> vs. Activin A<sup>-</sup>/A8301<sup>+</sup>, p < 0.001; Activin A<sup>+</sup>/A8301<sup>-</sup> vs. Activin A<sup>-</sup>/A8301<sup>+</sup>, p < 0.001) and (c) NKX2.5 (n = 3 each; Activin A<sup>-</sup>/A8301<sup>-</sup> vs. Activin A<sup>+</sup>/A8301<sup>-</sup>, p < 0.001; Activin A<sup>-</sup>/A8301<sup>-</sup> vs. Activin A<sup>-</sup>/A8301<sup>+</sup>, p < 0.001; Activin A<sup>+</sup>/A8301<sup>-</sup> vs. Activin A<sup>-</sup>/A8301<sup>+</sup>, p = 0.8649). (d-f) The effects of exogenous BMP4 (20 ng/mL) or BMP inhibitor (DMH1, 2  $\mu$ M). qPCR analysis of (e) NKX2.1 (n = 3 each; BMP4<sup>-</sup>/DMH1<sup>-</sup> vs. BMP4<sup>+</sup>/DMH1<sup>-</sup>, p < 0.001; BMP4<sup>-</sup>/DMH1<sup>-</sup> vs. BMP4<sup>-</sup>/DMH1<sup>+</sup>, p < 0.001; BMP4<sup>+</sup>/DMH1<sup>-</sup> vs. BMP4<sup>-</sup>/DMH1<sup>+</sup>, p < 0.001) and (f) NKX2.5 (n = 3 each; BMP4<sup>-</sup>/DMH1<sup>-</sup> vs. BMP4<sup>+</sup>/DMH1<sup>-</sup>, p < 0.001; BMP4<sup>-</sup>/DMH1<sup>-</sup> vs. BMP4<sup>-</sup>/DMH1<sup>+</sup>, p = 0.0044; BMP4<sup>+</sup>/DMH1<sup>-</sup> vs. BMP4<sup>-</sup>/DMH1<sup>+</sup>, p < 0.001). Scale bar = 500  $\mu$ m for whole well scan; Scale bar = 125  $\mu$ m for 20X images. All data are mean  $\pm$  SD. \*p < 0.05; \*\*p < 0.01; \*\*\*p < 0.001.

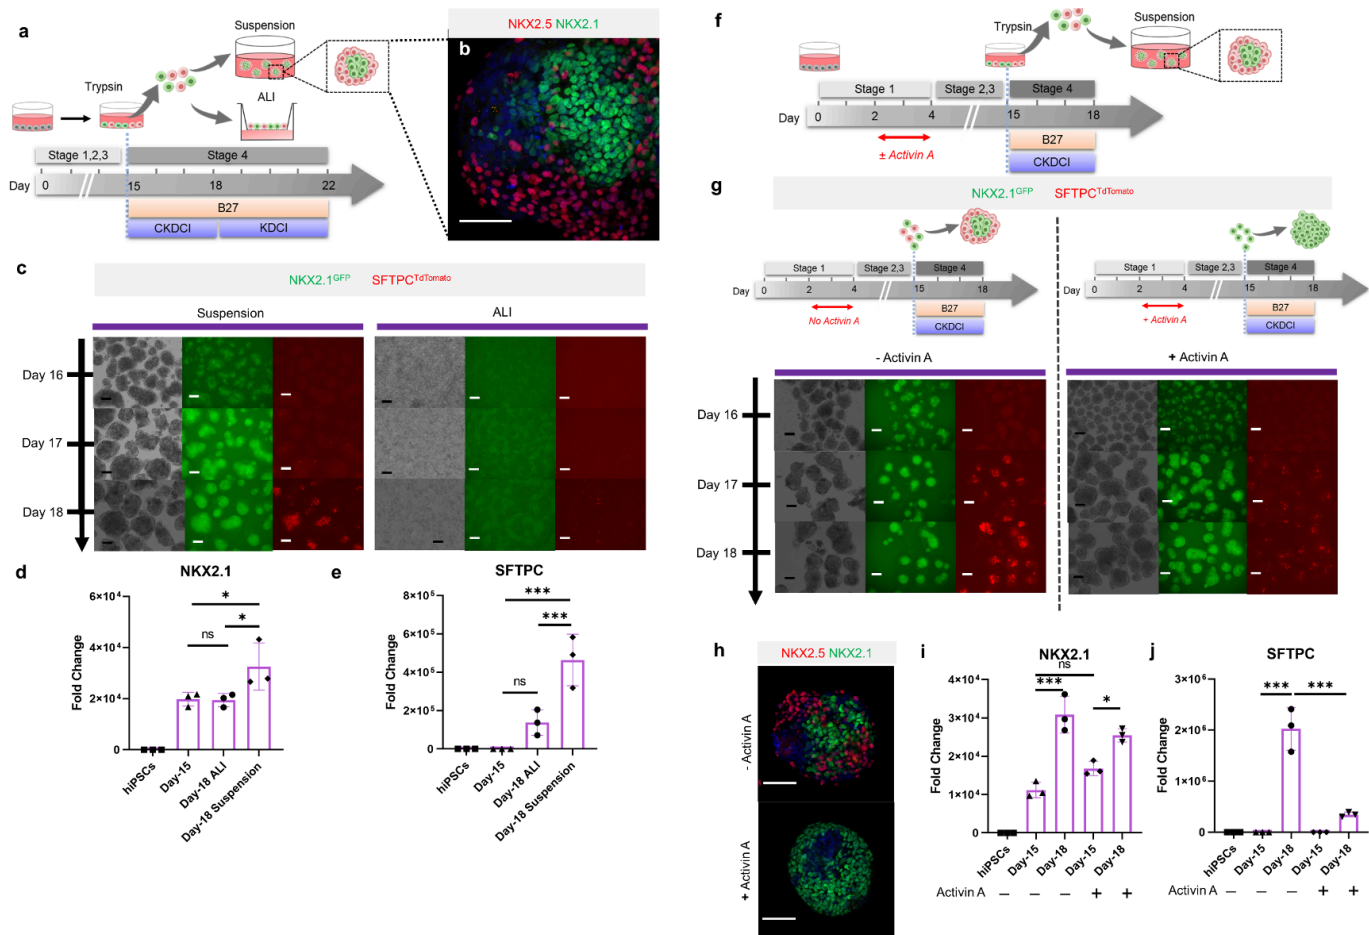

72 insert for air-liquid interface (ALI) culture or on 2D plastic surface for regular submerged culture, and failed to  
 73 detect obvious AT2 induction by Day 18 (Fig. 3c Supplementary Fig. 6). Consistent with the observations using  
 74 fluorescence reporters, NKX2.1 and SFTPC gene expression was significantly upregulated in 3D suspension  
 75 culture on Day-18 compared to the starting Day-15 cells or cells following ALI maturation (Fig. 3d,e). Our results  
 76 demonstrated 3D suspension culture as a robust platform to expedite alveolar maturation.

78 To elucidate how the co-induced cardiac lineage modulates the alveolar maturation process, we introduced  
 79 activin A (20 ng/mL) during germ-layer specification (Fig. 3f), which effectively inhibited mesoderm specification  
 80 and led to pulmonary-only differentiation outcome on Day-15 (Fig. 2a,b). In the absence of accompanying cardiac  
 81 cells, although NKX2.1<sup>GFP+</sup> lung progenitors can be robustly induced and maintained, their alveolar maturation  
 82 (as indicated by SFTPC<sup>tdTomato</sup> reporter) following 3 days of maturation in 3D suspension culture was dramatically  
 83 diminished compared to the cardio-pulmonary group (Fig. 3g). Whole mount imaging of  $\mu$ Ts on Day 18 showed

84 pulmonary-only differentiation  
 85 composed of majority NKX2.1<sup>+</sup>  
 86 cells, while cardio-pulmonary  $\mu$ Ts  
 87 were made up of concentric  
 88 NKX2.1<sup>+</sup> cells, surrounded by  
 89 NKX2.5<sup>+</sup> cells (Fig. 3h). This was  
 90 further supported by gene  
 91 expression analysis of NKX2.1  
 92 (Fig. 3i) and SFTPC (Fig. 3j).  
 93 Further extension of CKDCI  
 94 maturation period for 2 weeks up  
 95 to Day-29 in the pulmonary-only  
 96 group failed to produce AT2  
 97 induction to a level comparable to  
 98 the cardio-pulmonary group  
 99 (Supplementary Fig. 8). This  
 00 suggests that the cardiac lineage  
 01 can serve as a cellular niche in  
 02 supporting alveolar maturation.

### 03 Cardio-pulmonary segregation 04 in the dual-lineage micro- 05 Tissue ( $\mu$ T)

06 Spatial-temporal regulation of  
 07 WNT is crucial for early cardiac  
 08 differentiation,<sup>7,45,49</sup> however,  
 09 continuous exposure to WNT  
 10 activation is known to delay  
 11 contractile maturation of  
 12 cardiomyocytes.<sup>50</sup> In parallel,  
 13 exogenous WNT activation using  
 14 CHIR is essential for inducing  
 15 AT2 maturation and its  
 16 maintenance until the  
 17 endogenous AT2 niche is  
 18 established.<sup>16,51-53</sup> To investigate  
 19 how CHIR removal regulates  
 20 cardio-pulmonary maturation  
 21 following AT2 establishment on  
 22 Day-18 in 3D suspension culture  
 23 (Fig. 4g), we transitioned the  
 24 maturation medium from CKDCI  
 25 to KDCI without CHIR (Fig. 4a).<sup>16</sup>  
 26 To our surprise, upon CHIR  
 27 removal, the cardiac and  
 28 pulmonary components within  
 29 each dual-lineage  $\mu$ T, which  
 30 initially arranged in the  
 31 pulmonary-centered, concentric  
 32 manner (Fig. 4b), effectively  
 33 reorganized over time and  
 34 eventually segregated from each  
 35 other (Fig. 4a,b).

36 To quantitatively assess this  
 37 segregation process, we

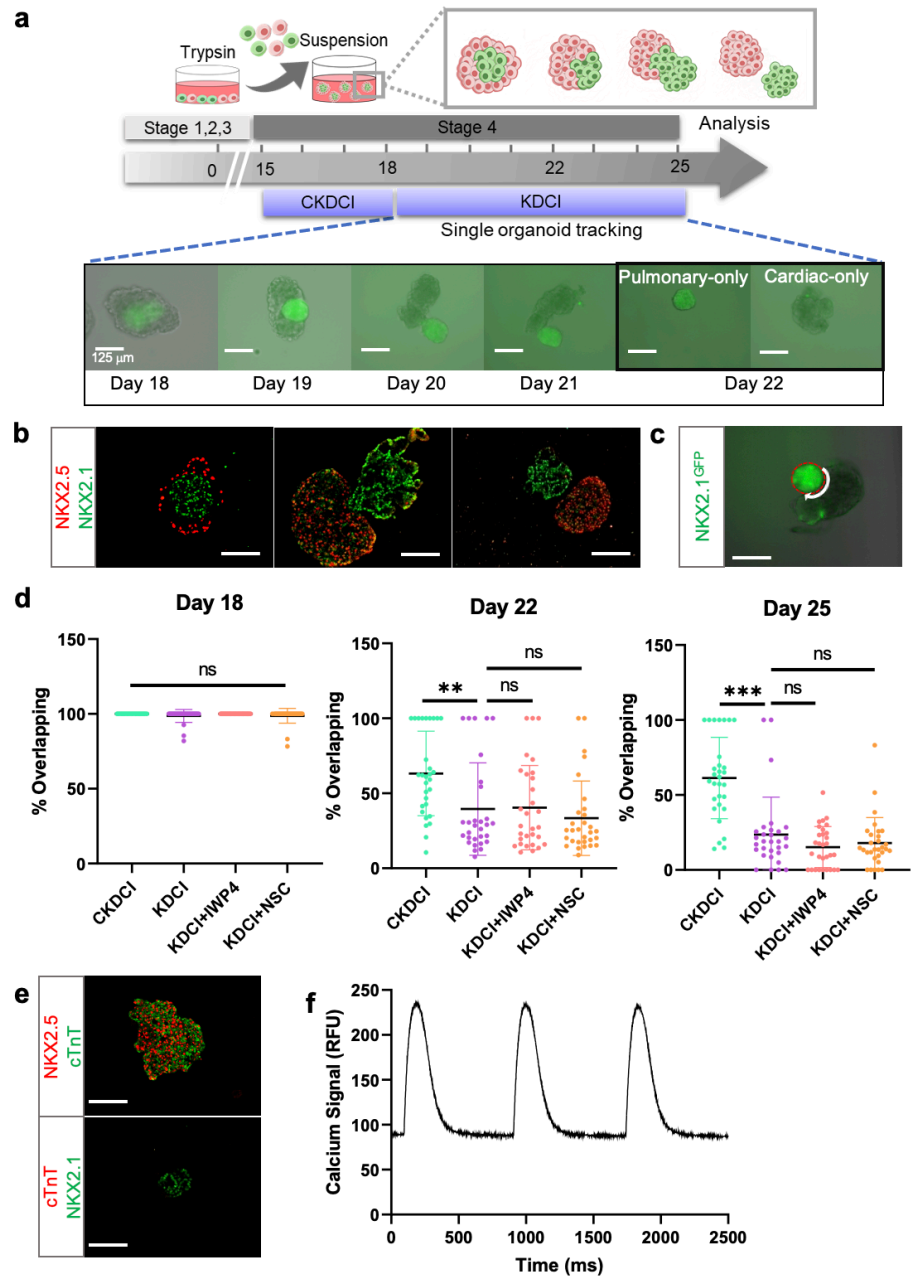

**Figure 4: Cardio-pulmonary segregation in the dual-lineage  $\mu$ T.** (a) Schematic diagram illustrating the timeline for the investigation. (b) Histological analysis of cardio-pulmonary  $\mu$ Ts at different stages of segregation. (c) Diagram showing measurement of the total perimeter of GFP<sup>+</sup> pulmonary compartment (red color) and its overlapping perimeter with non-GFP compartment (white color) using Image J. (d) Scatter plot showing percentage overlapping region of GFP<sup>+</sup> with non-GFP tissues on Day 18 (n=30 each; CKDCI vs. KDCI, p = 0.3979; CKDCI vs. KDCI + IWP4, p > 0.9999; CKDCI vs. KDCI + NSC, p = 0.4293; KDCI vs. KDCI + IWP4, p = 0.3979; KDCI vs. KDCI + NSC, p > 0.9999; KDCI + IWP4 vs. KDCI + NSC, p = 0.4293), Day 22 (n = 30 each; CKDCI vs. KDCI, p = 0.0077; CKDCI vs. KDCI + IWP4, p = 0.0112; CKDCI vs. KDCI + NSC, p < 0.001; KDCI vs. KDCI + IWP4, p = 0.9994; KDCI vs. KDCI + NSC, p = 0.8318; KDCI + IWP4 vs. KDCI + NSC, p = 0.7674) and Day 25 (n = 30 each; CKDCI vs. KDCI, p < 0.001; CKDCI vs. KDCI + IWP4, p < 0.001; CKDCI vs. KDCI + NSC, p < 0.001; KDCI vs. KDCI + IWP4, p = 0.4271; KDCI vs. KDCI + NSC, p = 0.7275; KDCI + IWP4 vs. KDCI + NSC, p = 0.9623). (e) Histological analysis of cTnT expression on the segregated cardiac and pulmonary  $\mu$ Ts, with co-staining of NKX2.5 and NKX2.1. (f) Calcium signal trace over time (ms). Scale bar = 125  $\mu$ m for 20X images. All data are mean  $\pm$  SD. \*p < 0.05; \*\*p < 0.01; \*\*\*p < 0.001.



40 performed time-lapse single- $\mu$ T tracking and calculated the percentage of overlapping between the cardiac and  
41 pulmonary tissues by measuring the length of overlapping border between the GFP<sup>+</sup> and non-GFP components  
42 and normalizing it by the total perimeter of the GFP<sup>+</sup> pulmonary component (Fig. 4c). We compared the  
43 segregation process in the presence (CKDCI) and absence (KDCI) of CHIR, and found that although cardio-  
44 pulmonary segregation took place in both medium conditions, it was significantly expedited by the withdrawal of  
45 CHIR (Fig. 4d). To investigate the requirement of endogenous WNT signaling for this segregation process, we  
46 introduced inhibitors of canonical (IWP4) and non-canonical (NSC668036, a Dishevelled inhibitor) WNT signaling,  
47<sup>54</sup> and did not detect obvious difference in the segregation process as compared to the control KDCI condition  
48 (Fig. 4d). In parallel with the cardio-pulmonary segregation, cardiac contraction was observed 7 days following  
49 CHIR withdrawal (Supplementary Video 1). Immunohistochemical analysis demonstrated specific co-expression  
50 of NKX2.5 and cardiac troponin T (cTnT) in the segregated cardiac  $\mu$ T (Fig. 4e). The contractile function of the  
51 segregated cardiac  $\mu$ T was further confirmed via the detection of calcium influx (Fig. 4f, Supplementary Video  
52 2).

## 55 Discussion

56  
57 Here, we described a novel strategy to model human cardio-pulmonary co-development using multi-lineage  
58 hPSC differentiation. We demonstrated that upon co-induction of mesoderm and endoderm, a series of shared  
59 signaling events were capable of driving simultaneous cardiac and pulmonary specification from their  
60 respective germ-layer progenitors. Transitioning the co-induced cardiac and pulmonary progenitors to 3D  
61 suspension culture, we observed expedited alveolar maturation within 3 days, which was supported by the  
62 accompanying cardiac lineage. In 3D suspension culture, each cardio-pulmonary  $\mu$ T effectively segregates  
63 into separate cardiac and pulmonary  $\mu$ Ts, which was partially inhibited by WNT activation. This study therefore  
64 delivers an effective *in vitro* model for studying the mechanistic interplay between developing heart and lung  
65 during human embryogenesis.

66  
67 The extensive cardio-pulmonary mutual interaction during organogenesis has been well documented in the  
68 mouse model,<sup>1,2,4</sup> however, the translatability of these findings to human embryogenesis remains elusive due  
69 to the lack of proper model systems. Human PSC differentiation has offered an effective means for  
70 recapitulating and investigating human organogenesis, and tremendous progresses have been made towards  
71 directed cardiac or pulmonary specification.<sup>7-23,39</sup> However, almost all existing models have been focusing on  
72 one parenchymal lineage at a time, and therefore lack the ability to support investigation on inter-organ  
73 crosstalk. Here, building on the established understanding of signaling events necessary for cardiac and  
74 pulmonary induction,<sup>7-23,39</sup> we have developed a robust protocol for simultaneous cardio-pulmonary co-  
75 differentiation from hPSCs. Within our co-differentiation system, unrestricted interaction between cells of both  
76 lineages is enabled even before their lineage commitment.

77  
78 Most current attempts on pulmonary induction from hPSCs relies on initial TGF- $\beta$  activation using growth factor  
79 (Activin A) supplementation, which is critical for definitive endoderm specification. Here, we showed that by  
80 fine tuning of WNT signaling using a small-molecule inhibitor of GSK-3 $\beta$  (CHIR), robust induction of endoderm  
81 and subsequently lung progenitors can be achieved without any exogenous growth factor. This is consistent  
82 with the observation that CHIR was capable of inducing cardiac differentiation in replacement of combined  
83 effect of exogenous Activin A and BMP4.<sup>7</sup> Nonetheless, Nodal and BMP signaling remains crucial in mesoderm  
84 and endoderm specification, as inhibition of these signaling abolished effective cardio-pulmonary co-induction.

85  
86 Our study demonstrated the requirement of endogenous TGF- $\beta$  signaling for effective cardio-pulmonary  
87 induction, as well as the critical role of endogenous BMP signaling for cardiogenesis. Furthermore, we found  
88 that temporal-specific action of the same set of small molecules regulating TGF- $\beta$  and WNT signaling was  
89 capable of driving mesoderm-to-cardiac and endoderm-to-pulmonary specification in a concurrent manner.  
90 Moreover, BMP4 has been shown to improve NKX2.1<sup>+</sup> lung progenitor specification in both mouse and human  
91 iPSCs.<sup>15,16,47</sup> In our system, endogenous instead of exogenous BMP signaling was required during a  
92 developmental stage corresponding to foregut ventralization for effective co-emergence of cardiac and  
93 pulmonary progenitors. This is in line with the close spatial positioning of developing heart and lung primordia  
94 within embryonic body patterning, which implies their exposure to a similar paracrine microenvironment.<sup>4,55</sup>

40  
41  
42  
43  
44  
45  
46  
47  
48  
49  
50  
51  
52  
53  
54  
55  
56  
57  
58  
59  
60  
61  
62  
63  
64  
65  
66  
67  
68  
69  
70  
71  
72  
73  
74  
75  
76  
77  
78  
79  
80  
81  
82  
83  
84  
85  
86  
87  
88  
89  
90  
91  
92  
93  
94  
95



To achieve alveolarization, NKX2.1<sup>+</sup> lung progenitors are usually embedded in extracellular matrices, such as Matrigel and collagen.<sup>42,46,48</sup> Here, we established an effective approach that enabled AT2 cell maturation within 3 days in suspension culture of 3D cell aggregates spontaneously formed from Day-15 cardiac and pulmonary progenitors. We further demonstrated that the presence of accompanying cardiac lineage is critical for robust alveolar induction. This observation is consistent with the recently reported inter-dependence between cardiac and pulmonary lineages during embryogenesis.<sup>4</sup> In addition, the presence of mesoderm-derived stromal cells has been shown to be essential for effective alveolarization *in vivo*<sup>55-57</sup> and *in vitro*.<sup>19,43</sup> Furthermore, cells of the mesodermal lineage are known to be robust producers of extracellular matrix, which may also contribute to the effective alveolar maturation in the absence of external extracellular matrix support. The ability to enable effective alveolar induction from hiPSC-derived lung progenitors in a convenient suspension culture also opens the door to large scale production of alveolar cells, a critical enabling step for regenerative medicine applications.

Using dual-lineage cardio-pulmonary  $\mu$ Ts formed from the co-induced progenitors, we observed a novel process of cardio-pulmonary tissue segregation. The human body cavities are highly crowded spaces, filled with different tissues and organs that are in close contact with each other. It remains enigmatic how inter-organ boundaries are maintained to prevent undesired cell migration or tissue merging. Our cardio-pulmonary tissue segregation model suggests an intrinsic mechanism that effectively establishes a boundary between two distinct parenchymal lineages even when they are initially mingled together. Although no model of collective migration has been described in the context of cardio-pulmonary development, studies in other model systems suggest cell-cell communication and paracrine signaling (e.g. WNT) to be crucial for directed cell migration during development.<sup>58-60</sup> Here we found that exogenous WNT activation via GSK-3 $\beta$  inhibition effectively slowed down the cardio-pulmonary segregation, while inhibition of endogenous WNT (canonical and non-canonical) did not obviously affect the process. In consistence with our observation, it has been shown that inhibition of non-canonical WNT signaling does not stop collective cell migration but distorting migration direction.<sup>54</sup>

In conclusion, our work offers a novel model for investigating the molecular and cellular mechanisms underlying human cardio-pulmonary co-development and tissue boundary formation. We also expect this work to be of potential use for studying congenital diseases affecting both cardiovascular and pulmonary systems, such as congenital diaphragmatic hernia.

## Materials and Methods

### Materials

Detailed information regarding reagents for culture and differentiation medium was summarized in Supplementary Table 1. Reagents, equipment, and probes for quantitative PCR (qPCR) analysis were summarized in Supplementary Table 3. Antibodies and Reagents for immunofluorescence staining were summarized in Supplementary Table 4.

### Maintenance of human induced pluripotent stem cells (hiPSCs)

The BU3-NGST hiPSC line was obtained as a kind gift from the laboratories of Dr. Darrell Kotton and Dr. Finn Hawkins (Boston University). BU3 hiPSC line was derived from a healthy donor and carries both NKX2.1<sup>GFP</sup> (NG) and Surfactant protein C (SFTPC)<sup>tdTomato</sup> (ST) reporters.<sup>42,43</sup> hiPSCs were maintained on Matrigel-coated (ESC-qualified) 6-well tissue culture plate with mTESR1 Plus medium with regular medium changed every other day. hiPSCs passaging was performed every 5-7 days using ReLESR at a plating ratio of 1:10. All cells used in this study were tested negative for mycoplasma contamination using Universal Mycoplasma Detection Kit (ATCC, 30-1012K).

### Simultaneous induction of cardiac and pulmonary progenitors from hPSCs

hiPSCs maintained in mTESR Plus were dissociated into single cells using StemPro Accutase. 150,000 cells/cm<sup>2</sup> on hESC-qualified Matrigel-coated 96-well plate, and cultured in mTESR Plus supplemented with 10  $\mu$ M Y-27632 (ROCK inhibitor) for 24 hrs prior to differentiation. The overall protocol for stepwise cardio-pulmonary co-differentiation was summarized in Supplementary Table 2. To induce a balanced mixture of mesodermal and

definitive endodermal cells, hiPSCs were first incubated in mTESR Plus medium supplemented with different concentration (4, 7, 10  $\mu$ M) of CHIR99021 (GSK3 $\beta$  inhibitor) and 10  $\mu$ M Y-27632 for 48 hrs. This was followed by an additional 48 hrs incubation in serum-free differentiation medium consisting of RPMI 1640 supplemented with 2% B-27 minus insulin, 1 x GlutaMAX and 10  $\mu$ M Y-27632. In some experiments, Activin A (20 ng/mL), BMP4 (20 ng/mL), A8301 (TGF- $\beta$  inhibitor, 1  $\mu$ M) or DMH-1 (BMP inhibitor, 2  $\mu$ M) were introduced to examine how TGF- $\beta$  and BMP signaling regulated mesodermal and endodermal specification. Differentiation outcomes were assessed by immunostaining and qPCR analysis of mesodermal (NCAM1) and definitive endodermal (SOX17) markers.

Following Stage-1, all subsequent differentiation procedures were performed using medium recipes formulated based on RPMI 1640 medium supplemented with 2% B-27 and 1x GlutaMAX, referred to as 'basal medium'. To initiate simultaneous cardiac and pulmonary specification, Day-4 cells were incubated for 4 days in Stage-2 medium, containing basal medium supplemented with 1  $\mu$ M A8301, 5  $\mu$ M IWP4 and 10  $\mu$ M Y-27632. In some experiments, co-differentiation medium without either A8301 or IWP4 was utilized to investigate the impact of inhibition of TGF- $\beta$  and WNT signaling.

Following Stage-2, to induce simultaneous specification of both cardiac and lung progenitors, co-differentiating cells were incubated for 7 days in Stage-3 medium containing basal medium supplemented with 3  $\mu$ M CHIR99021 and 100 nM Retinoic acid (RA). Green fluorescence of the NKX2.1<sup>GFP</sup> reporter was examined daily using EVOS FL Auto 2 Imaging System to monitor the emergence of lung progenitors. On Day-15 of co-differentiation, the expression of cardiac (NKX2.5) and lung (NKX2.1) progenitor markers was evaluated by immunofluorescence staining and qPCR.

### **Co-maturation of cardio-pulmonary progenitors in air-liquid interface (ALI) culture**

On Day-15 of cardio-pulmonary co-differentiation, cells were dissociated into single cells using TrypLE Express, and re-plated at 500,000 cells/cm<sup>2</sup> onto the apical side of each 24-well Transwell insert (pore size of 0.4  $\mu$ m, pre-coated with 1% growth factor-reduced Matrigel) in 100  $\mu$ L maturation medium. Basolateral side of the transwell insert was filled with 500  $\mu$ L of maturation medium. The maturation medium was basal medium supplemented with 3  $\mu$ M CHIR99021, 10 ng/mL Keratinocyte growth factor (KGF), 50 nM Dexamethasone, 0.1 mM 8-bromoadenosine 3', 5'-cyclic monophosphate (cAMP, AMP-activated protein kinase activator) and 0.1 mM 3-isobutyl-1-methylxanthine (IBMX, PKA activator), which was referred to as **CKDCI** medium. 10  $\mu$ M Y-27632 was added during the initial 24 hrs following re-plating. The next day, all medium on the apical side was removed. 200  $\mu$ L of fresh CKDCI medium without Y-27632 was added to the basolateral side to establish ALI culture, and was replaced daily. Red fluorescence from the SFTPC<sup>TdTomato</sup> reporter was examined daily using EVOS Imaging System to monitor the emergence of alveolar type 2 (AT2) cells. On Day-3 of ALI maturation, Transwell membrane were excised from the insert, and analyzed by qPCR (NKX2.1, SFTPC).

### **Co-maturation of cardio-pulmonary $\mu$ Ts in 3D suspension culture**

On Day-15 of cardio-pulmonary co-differentiation, cells were dissociated into single cells using TrypLE Express. A total of 250,000 cells in 500  $\mu$ L CKDCI maturation medium was transferred into each well of 24-well ultra-low adherence plate and cultured with agitation at 125 rpm to form cardio-pulmonary  $\mu$ Ts. 10  $\mu$ M Y-27632 was added during the initial 24 hrs following re-plating. Following 3 days of culture in CKDCI medium, CHIR99021 was removed and  $\mu$ T culture was continued in KDCI medium for an additional 7 days. At desired time points of 3D suspension maturation,  $\mu$ Ts were analyzed by histology (NKX2.1, NKX2.5, cTnT) and qPCR analysis (NKX2.1, SFTPC).

### **Single $\mu$ T time-lapse imaging and analysis**

To investigate the segregation of cardio-pulmonary  $\mu$ Ts into their respective cardiac and lung  $\mu$ Ts, following 3 days suspension culture in CKDCI medium in 24-well ultra-low adherence plate, single  $\mu$ T was transferred into each well in 96-well ultra-low adherence plate and cultured for an additional 7 days. The following medium recipes were examined for cardio-pulmonary segregation: KDCI medium, KDCI medium supplemented with 3  $\mu$ M CHIR99021, KDCI medium with 5  $\mu$ M IWP4, and KDCI medium with 50  $\mu$ M NSC668036. Time-lapse imaging was performed on Day- 18, Day-22 and Day-25 following  $\mu$ T transfer to monitor the segregation process. The pulmonary compartment within each cardio-pulmonary  $\mu$ T was tracked based on the NKX2.1<sup>GFP</sup> reporter. To quantify the segregation between the two compartments within each  $\mu$ T. Image J was used to measure the

07 overlapping perimeter between GFP<sup>+</sup> (pulmonary) and non-GFP (cardiac) compartments, which was then  
08 normalized to total perimeter of GFP<sup>+</sup> compartments and expressed as the percentage of overlapping.  
09

$$\text{Percent overlapping (\%)} = \frac{\text{Overlapping Perimeter of GFP and nonGFP compartments } (\mu\text{m})}{\text{Total Perimeter of GFP organoids } (\mu\text{m})} \times 100\%$$

### 13 qPCR analysis

14 Total RNA was extracted using TRIzol, processed by chloroform extraction, precipitated using 1 volume of  
15 absolute isopropanol with 50  $\mu\text{g}/\text{mL}$  of RNase-free glycoblue as carrier, washed with 75% ethanol, air-dried,  
16 solubilized in RNase-free water and quantified using NanoDrop 2000 spectrophotometer. cDNA was synthesized  
17 via reverse transcription of 1  $\mu\text{g}$  total RNA with random hexamers and the High-Capacity cDNA Reverse  
18 Transcription kit according to manufacturer's instruction. Real-time qPCR analysis was performed on CFX96  
19 Touch Real-Time PCR Detection System using TaqMan probes. Each reaction mixture was prepared by  
20 combining 1  $\mu\text{L}$  of probe, 10  $\mu\text{L}$  of TaqMan Master Mix, 1  $\mu\text{L}$  of cDNA (equivalent to 50 ng), and the final volume  
21 was brought up to 20  $\mu\text{L}$ . The final Ct value was normalized to housekeeping gene ( $\beta$ -actin), using comparative  
22 Ct method. Unless otherwise specified, baseline, defined as fold change =1, was set as undifferentiated hiPSCs,  
23 or if undetected, a cycle number of 40 was assigned to allow fold change calculations.<sup>42</sup> List of TaqMan probes  
24 was summarized in Supplementary Table 3.  
25

### 26 Immunofluorescence staining on 2D cell samples

27 Cells were fixed with ice-cold methanol, air-dried, rehydrated with phosphate-buffered saline (PBS),  
28 permeabilized with 1% (v/v) Triton X-100, blocked in 1% (w/v) bovine serum albumin in PBS (blocking buffer),  
29 incubated with primary antibodies diluted in blocking buffer at 4°C overnight, and incubated with corresponding  
30 fluorescence-conjugated secondary antibodies in blocking buffer at room temperature (RT) for 45 min. Nuclear  
31 counterstain was performed using Hoechst-33342 (1:500) in PBS. Fluorescence images were acquired using  
32 EVOS Imaging System. All antibodies used and their respective dilution were summarized in Supplementary  
33 Table 4.  
34

### 35 Histology

36 The  $\mu\text{T}$ s were fixed with 4% paraformaldehyde, embedded in HistoGel and then in paraffin. Tissue processing  
37 and paraffin embedding was performed in Research Histology Lab of Pitt Biospecimen Core at the University of  
38 Pittsburgh Medical Center (UPMC) Shadyside Hospital. Paraffin blocks were sectioned at 5  $\mu\text{m}$  thickness,  
39 transferred onto glass slides, rehydrated by sequential incubation in HistoClear, 100% ethanol, 95% ethanol and  
40 distilled water. To unmask antigen, slides were treated with Antigen Unmasking Solution at 95°C for 20 min and  
41 cooled down to RT. Immunofluorescence staining was performed as described above for 2D cell samples. After  
42 the final wash, slides were mounted with DAPI Fluoromount-G, and imaged using EVOS Imaging System. All  
43 antibodies used and their respective dilution were summarized in Supplementary Table 4.  
44

### 45 Contraction and calcium signal

46 To assess contraction of cardiac  $\mu\text{T}$ , segregated cardiac  $\mu\text{T}$  was stained with 5  $\mu\text{M}$  of Cal-520 AM (AAT Bioquest,  
47 21130), a calcium indicator dye. Calcium imaging (500 frames per second) was performed using a Prime 95B  
48 Scientific CMOS camera (Photometrics) mounted on an epifluorescent stereomicroscope (Nikon SMZ1000) with  
49 a GFP filter and an X-cite Lamp (Excelitas).  
50

### 51 TEM

52 Cardio-pulmonary  $\mu\text{T}$ s were fixed in 2.5% glutaraldehyde in 0.1 M PBS (pH7.4) for at least 1 hr. After 3 washes  
53 in 0.1 M PBS for 10 min each, the  $\mu\text{T}$ s were post fixed in 1% Osmium tetroxide containing 1% potassium  
54 ferricyanide at 4°C for 1 hr, followed by 3 washes in 0.1 M PBS for 10 min each.  $\mu\text{T}$ s were dehydrated in graded  
55 series of ethanol starting from 30%, 50%, 70%, 90% and finally 100% of ethanol for 10 min each.  $\mu\text{T}$ s were  
56 further dehydrated epon for 1 hr at RT. This step was repeated for another three times prior to embedding in  
57 pure epon at 37°C for 24 hrs. Finally, the  $\mu\text{T}$ s were cured for 48 hrs at 60°C. The presence of lamellar body in  
58 cardio-pulmonary  $\mu\text{T}$ s were identified using JEM 1400 Flash TEM.  
59

### 60 Statistics

61 Statistical methods relevant to each figure were outlined in the accompanying figure legend. At least three  
62 biological replicates were performed for each group under comparison. Unless otherwise indicated, unpaired, 2-  
63 tailed Student's t tests were applied to comparisons between two groups. For comparisons among three or more  
64 groups, one-way ANOVA was performed followed by Tukey multiple comparison tests. Results are displayed as  
65 mean  $\pm$  SD, with  $p < 0.05$  considered statically significant. n values referred to biologically independent replicates.  
66

## 67 Data availability

68 The authors declare that all data supporting the findings of this study are available within the article and its  
69 supplementary material files, or from the corresponding author on reasonable request.  
70

## 71 References

- 72 1 Peng, T. *et al.* Coordination of heart and lung co-development by a multipotent cardiopulmonary progenitor.  
73 *Nature* **500**, 589-592, doi:10.1038/nature12358 (2013).
- 74 2 Hoffmann, A. D., Peterson, M. A., Friedland-Little, J. M., Anderson, S. A. & Moskowitz, I. P. sonic hedgehog is  
75 required in pulmonary endoderm for atrial septation. *Development (Cambridge, England)* **136**, 1761-1770,  
76 doi:10.1242/dev.034157 (2009).
- 77 3 Arora, R., Metzger, R. J. & Papaioannou, V. E. Multiple Roles and Interactions of Tbx4 and Tbx5 in Development  
78 of the Respiratory System. *PLoS Genetics* **8**, e1002866, doi:10.1371/journal.pgen.1002866 (2012).
- 79 4 Steimle, J. D. *et al.* Evolutionarily conserved Tbx5-Wnt2/2b pathway orchestrates cardiopulmonary development.  
80 *Proceedings of the National Academy of Sciences* **115**, E10615-E10624, doi:10.1073/pnas.1811624115 (2018).
- 81 5 Zhou, L. *et al.* Gata4 potentiates second heart field proliferation and Hedgehog signaling for cardiac septation.  
82 *Proceedings of the National Academy of Sciences* **114**, E1422-E1431, doi:10.1073/pnas.1605137114 (2017).
- 83 6 Hoffmann, A. D., Peterson, M. A., Friedland-Little, J. M., Anderson, S. A. & Moskowitz, I. P. Sonic hedgehog is  
84 required in pulmonary endoderm for atrial septation. *Development* **136**, 1761-1770, doi:10.1242/dev.034157  
85 (2009).
- 86 7 Lian, X. *et al.* Robust cardiomyocyte differentiation from human pluripotent stem cells via temporal modulation of  
87 canonical Wnt signaling. *Proceedings of the National Academy of Sciences* **109**, E1848-1857,  
88 doi:10.1073/pnas.1200250109 (2012).
- 89 8 Mummery, C. L. *et al.* Differentiation of human embryonic stem cells and induced pluripotent stem cells to  
90 cardiomyocytes: a methods overview. *Circulation research* **111**, 344-358, doi:10.1161/CIRCRESAHA.110.227512  
91 (2012).
- 92 9 Laflamme, M. A. *et al.* Cardiomyocytes derived from human embryonic stem cells in pro-survival factors enhance  
93 function of infarcted rat hearts. *Nat Biotechnol* **25**, 1015-1024, doi:10.1038/nbt1327 (2007).
- 94 10 Burridge, P. W. *et al.* Chemically defined generation of human cardiomyocytes. *Nature methods* **11**, 855,  
95 doi:10.1038/nmeth.2999 (2014).
- 96 11 Lian, X. *et al.* Chemically defined, albumin-free human cardiomyocyte generation. *Nature methods* **12**, 595,  
97 doi:10.1038/nmeth.3448 (2015).
- 98 12 Lee, J. H., Protze, S. I., Laksman, Z., Backx, P. H. & Keller, G. M. Human Pluripotent Stem Cell-Derived Atrial  
99 and Ventricular Cardiomyocytes Develop from Distinct Mesoderm Populations. *Cell stem cell* **21**, 179-194.e174,  
00 doi:10.1016/j.stem.2017.07.003 (2017).
- 01 13 Kattman, S. J. *et al.* Stage-specific optimization of activin/nodal and BMP signaling promotes cardiac  
02 differentiation of mouse and human pluripotent stem cell lines. *Cell stem cell* **8**, 228-240,  
03 doi:10.1016/j.stem.2010.12.008 (2011).
- 04 14 Chen, Y.-W. *et al.* A three-dimensional model of human lung development and disease from pluripotent stem  
05 cells. *Nature Cell Biology* **19**, 542, doi:10.1038/ncb3510 (2017).
- 06 15 Huang, S. X. L. *et al.* Efficient generation of lung and airway epithelial cells from human pluripotent stem cells. *Nat*  
07 *Biotech* **32**, 84-91, doi:10.1038/nbt.2754 (2014).
- 08 16 Jacob, A. *et al.* Differentiation of Human Pluripotent Stem Cells into Functional Lung Alveolar Epithelial Cells. *Cell*  
09 *stem cell* **21**, 472-488.e410, doi:doi.org/10.1016/j.stem.2017.08.014 (2017).
- 10 17 D'Amour, K. A. *et al.* Efficient differentiation of human embryonic stem cells to definitive endoderm. *Nat Biotech*  
11 **23**, 1534-1541 (2005).
- 12 18 Dye, B. R. *et al.* In vitro generation of human pluripotent stem cell derived lung organoids. *eLife* **4**, e05098,  
13 doi:10.7554/eLife.05098 (2015).
- 14 19 Gotoh, S. *et al.* Generation of alveolar epithelial spheroids via isolated progenitor cells from human pluripotent  
15 stem cells. *Stem cell reports* **3**, 394-403, doi:10.1016/j.stemcr.2014.07.005 (2014).
- 16 20 Longmire, T. A. *et al.* Efficient Derivation of Purified Lung and Thyroid Progenitors from Embryonic Stem Cells.  
17 *Cell stem cell* **10**, 398-411 (2012).
- 18 21 Wong, A. P. *et al.* Directed differentiation of human pluripotent stem cells into mature airway epithelia expressing  
19 functional CFTR protein. *Nat Biotech* **30**, 876-882 (2012).



- 20 22 Lian, X., Zhang, J., Zhu, K., Kamp, T. J. & Palecek, S. P. Insulin inhibits cardiac mesoderm, not mesendoderm,  
21 formation during cardiac differentiation of human pluripotent stem cells and modulation of canonical Wnt signaling  
22 can rescue this inhibition. *Stem cells (Dayton, Ohio)* **31**, 447-457, doi:10.1002/stem.1289 (2013).
- 23 23 Mou, H. *et al.* Generation of Multipotent Lung and Airway Progenitors from Mouse ESCs and Patient-Specific  
24 Cystic Fibrosis iPSCs. *Cell stem cell* **10**, 385-397 (2012).
- 25 24 Loh, Kyle M. *et al.* Efficient Endoderm Induction from Human Pluripotent Stem Cells by Logically Directing Signals  
26 Controlling Lineage Bifurcations. *Cell stem cell* **14**, 237-252, doi:10.1016/j.stem.2013.12.007 (2014).
- 27 25 Kim, M.-S. *et al.* Activin-A and Bmp4 levels modulate cell type specification during CHIR-induced  
28 cardiomyogenesis. *PLoS one* **10**, e0118670-e0118670, doi:10.1371/journal.pone.0118670 (2015).
- 29 26 Levak-Svajger, B. & Svajger, A. Investigation on the origin of the definitive endoderm in the rat embryo. *Journal of*  
30 *embryology and experimental morphology* **32**, 445-459 (1974).
- 31 27 Lawson, K. A., Meneses, J. J. & Pedersen, R. A. Clonal analysis of epiblast fate during germ layer formation in  
32 the mouse embryo. *Development (Cambridge, England)* **113**, 891-911 (1991).
- 33 28 Tam, P. P. & Beddington, R. S. The formation of mesodermal tissues in the mouse embryo during gastrulation  
34 and early organogenesis. *Development (Cambridge, England)* **99**, 109-126 (1987).
- 35 29 Spence, J. R. *et al.* Directed differentiation of human pluripotent stem cells into intestinal tissue in vitro. *Nature*  
36 **470**, 105-109, doi:10.1038-nature09691 (2011).
- 37 30 Willems, E. *et al.* Small-molecule inhibitors of the Wnt pathway potently promote cardiomyocytes from human  
38 embryonic stem cell-derived mesoderm. *Circ Res* **109**, 360-364, doi:10.1161/circresaha.111.249540 (2011).
- 39 31 Wang, H., Hao, J. & Hong, C. C. Cardiac induction of embryonic stem cells by a small molecule inhibitor of  
40 Wnt/beta-catenin signaling. *ACS Chem Biol* **6**, 192-197, doi:10.1021/cb100323z (2011).
- 41 32 Ren, Y. *et al.* Small molecule Wnt inhibitors enhance the efficiency of BMP-4-directed cardiac differentiation of  
42 human pluripotent stem cells. *Journal of molecular and cellular cardiology* **51**, 280-287,  
43 doi:10.1016/j.yjmcc.2011.04.012 (2011).
- 44 33 Tran, T. H. *et al.* Wnt3a-induced mesoderm formation and cardiomyogenesis in human embryonic stem cells.  
45 *Stem cells (Dayton, Ohio)* **27**, 1869-1878, doi:10.1002/stem.95 (2009).
- 46 34 Chen, F. *et al.* Inhibition of Tgf $\beta$  signaling by endogenous retinoic acid is essential for primary lung bud induction.  
47 *Development (Cambridge, England)* **134**, 2969-2979, doi:10.1242/dev.006221 (2007).
- 48 35 McCauley, K. B. *et al.* Efficient Derivation of Functional Human Airway Epithelium from Pluripotent Stem Cells via  
49 Temporal Regulation of Wnt Signaling. *Cell stem cell*, doi:10.1016/j.stem.2017.03.001 (2017).
- 50 36 Lufkin, T., Dierich, A., LeMeur, M., Mark, M. & Chambon, P. Disruption of the Hox-1.6 homeobox gene results in  
51 defects in a region corresponding to its rostral domain of expression. *Cell* **66**, 1105-1119 (1991).
- 52 37 Makki, N. & Capecchi, M. R. Cardiovascular defects in a mouse model of HOXA1 syndrome. *Human molecular*  
53 *genetics* **21**, 26-31, doi:10.1093/hmg/ddr434 (2012).
- 54 38 Chisaka, O. & Capecchi, M. R. Regionally restricted developmental defects resulting from targeted disruption of  
55 the mouse homeobox gene hox-1.5. *Nature* **350**, 473-479, doi:10.1038/350473a0 (1991).
- 56 39 Green, M. D. *et al.* Generation of anterior foregut endoderm from human embryonic and induced pluripotent stem  
57 cells. *Nat Biotech* **29**, 267-272 (2011).
- 58 40 Paige, S. L. *et al.* Endogenous Wnt/beta-catenin signaling is required for cardiac differentiation in human  
59 embryonic stem cells. *PLoS one* **5**, e111134, doi:10.1371/journal.pone.0011134 (2010).
- 60 41 Ng, E. S., Davis, R., Stanley, E. G. & Elefanty, A. G. A protocol describing the use of a recombinant protein-  
61 based, animal product-free medium (APEL) for human embryonic stem cell differentiation as spin embryoid  
62 bodies. *Nature protocols* **3**, 768-776, doi:10.1038/nprot.2008.42 (2008).
- 63 42 Jacob, A. *et al.* Differentiation of Human Pluripotent Stem Cells into Functional Lung Alveolar Epithelial Cells. *Cell*  
64 *stem cell* **21**, 472-488, doi:10.1016/j.stem.2017.08.014 (2017).
- 65 43 Hawkins, F. *et al.* Prospective isolation of NKX2-1-expressing human lung progenitors derived from pluripotent  
66 stem cells. *The Journal of clinical investigation* **127**, 2277-2294, doi:10.1172/jci89950 (2017).
- 67 44 Kempf, H. *et al.* Bulk cell density and Wnt/TGFbeta signalling regulate mesendodermal patterning of human  
68 pluripotent stem cells. *Nature communications* **7**, 13602, doi:10.1038/ncomms13602 (2016).
- 69 45 Zhao, M., Tang, Y., Zhou, Y. & Zhang, J. Deciphering Role of Wnt Signalling in Cardiac Mesoderm and  
70 Cardiomyocyte Differentiation from Human iPSCs: Four-dimensional control of Wnt pathway for hiPSC-CMs  
71 differentiation. *Sci Rep* **9**, 19389, doi:10.1038/s41598-019-55620-x (2019).
- 72 46 Dye, B. R. *et al.* In vitro generation of human pluripotent stem cell derived lung organoids. *eLife* **4**,  
73 doi:10.7554/eLife.05098 (2015).
- 74 47 Serra, M. *et al.* Pluripotent stem cell differentiation reveals distinct developmental pathways regulating lung-  
75 versus thyroid-lineage specification. *Development (Cambridge, England)* **144**, 3879, doi:10.1242/dev.150193  
76 (2017).
- 77 48 de Carvalho, A. *et al.* Glycogen synthase kinase 3 induces multilineage maturation of human pluripotent stem  
78 cell-derived lung progenitors in 3D culture. *Development (Cambridge, England)* **146**, doi:10.1242/dev.171652  
79 (2019).

- 80 49 Buikema, J. W. *et al.* Wnt Activation and Reduced Cell-Cell Contact Synergistically Induce Massive Expansion of  
81 Functional Human iPSC-Derived Cardiomyocytes. *Cell stem cell* **27**, 50-63.e55, doi:10.1016/j.stem.2020.06.001  
82 (2020).
- 83 50 Fan, Y. *et al.* Wnt/beta-catenin-mediated signaling re-activates proliferation of matured cardiomyocytes. *Stem Cell*  
84 *Res Ther* **9**, 338, doi:10.1186/s13287-018-1086-8 (2018).
- 85 51 Abdelwahab, E. M. M. *et al.* Wnt signaling regulates trans-differentiation of stem cell like type 2 alveolar epithelial  
86 cells to type 1 epithelial cells. *Respiratory research* **20**, 204, doi:10.1186/s12931-019-1176-x (2019).
- 87 52 Nabhan, A. N., Brownfield, D. G., Harbury, P. B., Krasnow, M. A. & Desai, T. J. Single-cell Wnt signaling niches  
88 maintain stemness of alveolar type 2 cells. *Science* **359**, 1118-1123, doi:10.1126/science.aam6603 (2018).
- 89 53 Frank, D. B. *et al.* Emergence of a Wave of Wnt Signaling that Regulates Lung Alveologenesis by Controlling  
90 Epithelial Self-Renewal and Differentiation. *Cell reports* **17**, 2312-2325, doi:10.1016/j.celrep.2016.11.001 (2016).
- 91 54 Li, D. & Wang, Y. L. Coordination of cell migration mediated by site-dependent cell-cell contact. *Proceedings of*  
92 *the National Academy of Sciences of the United States of America* **115**, 10678-10683,  
93 doi:10.1073/pnas.1807543115 (2018).
- 94 55 Herriges, M. & Morrisey, E. E. Lung development: orchestrating the generation and regeneration of a complex  
95 organ. *Development (Cambridge, England)* **141**, 502-513, doi:10.1242/dev.098186 (2014).
- 96 56 Domyan, E. T. *et al.* Signaling through BMP receptors promotes respiratory identity in the foregut via repression  
97 of Sox2. *Development (Cambridge, England)* **138**, 971-981, doi:10.1242/dev.053694 (2011).
- 98 57 Rankin, S. A. *et al.* A Retinoic Acid-Hedgehog Cascade Coordinates Mesoderm-Inducing Signals and Endoderm  
99 Competence during Lung Specification. *Cell reports* **16**, 66-78, doi:10.1016/j.celrep.2016.05.060 (2016).
- 00 58 Ciruna, B. & Rossant, J. FGF signaling regulates mesoderm cell fate specification and morphogenetic movement  
01 at the primitive streak. *Developmental cell* **1**, 37-49, doi:10.1016/s1534-5807(01)00017-x (2001).
- 02 59 De Calisto, J., Araya, C., Marchant, L., Riaz, C. F. & Mayor, R. Essential role of non-canonical Wnt signalling in  
03 neural crest migration. *Development (Cambridge, England)* **132**, 2587-2597, doi:10.1242/dev.01857 (2005).
- 04 60 Carmona-Fontaine, C. *et al.* Contact inhibition of locomotion in vivo controls neural crest directional migration.  
05 *Nature* **456**, 957-961, doi:10.1038/nature07441 (2008).

## 06 **Acknowledgments**

07 This work was supported by Samuel & Emma Winters Foundation A025662 (to X.R.) and the Department of  
08 Biomedical Engineering and College of Engineering at Carnegie Mellon University. We are grateful to Drs. Yu-li  
09 Wang and David Li for advice on collective cell migration, to Misti West for laboratory management, and to  
10 Anthony Green and the Pitt Biospecimen Core at the University of Pittsburgh for assistance with histology.  
11  
12

## 13 **Author's contributions**

14 X.R. and W.H.N. designed the project and wrote the manuscript. W.H.N., E.K.J and J.M.B performed the  
15 experiments and analyzed data. W.H.N., X.R., J.J.T., J.M.B., A.W.F. and F.H. interpreted data. D.B.S. and M.S.  
16 performed the electron microscopy analysis. F.H. and D.N.K. provided the BU3-NGST and BU1 hiPSC lines and  
17 advised on pulmonary differentiation. J.J.T., E.K.J., J.M.B. and F.H. edited the manuscript.  
18  
19  
20

21 **SUPPLEMENTARY INFORMATION**

22 **Supplementary Table 1: Tissue culture reagents, small molecules and growth factors**

23

| <b>Tissue Culture Reagents</b>                                 |                          |              |
|----------------------------------------------------------------|--------------------------|--------------|
| Name                                                           | Source                   | Catalog No.  |
| hESC-qualified Matrigel Basement Membrane Matrix               | Corning                  | 354234       |
| mTESR™ Plus                                                    | Stem Cell Technologies   | 05825        |
| Dulbecco's Phosphate-Buffered Saline (DPBS)                    | Corning                  | 45000-430    |
| ReLESR™                                                        | Stem Cell Technologies   | 05873        |
| StemPro® Accutase® Cell Dissociation Reagent                   | Thermo Fisher Scientific | A1110501     |
| RPMI1640                                                       | Corning                  | 10-040-CV    |
| GlutaMAX™                                                      | Thermo Fisher Scientific | 35050061     |
| B-27 minus insulin Supplement                                  | Thermo Fisher Scientific | A1895601     |
| B-27 Supplement (Complete)                                     | Invitrogen               | 12587-010    |
| TrypLE Express                                                 | Thermo Fisher Scientific | 12605028     |
| Hyclone FetalClone 1 Serum (U.S)                               | GE Healthcare            | SH30080.03   |
| Growth Factor Reduced Matrigel                                 | Corning                  | 356230       |
| Transwell insert (0.4 µm)                                      | Greiner Bio-One          | 662641       |
| Ultra-low adherence 24-well Plate                              | Greiner Bio-One          | 662970       |
| Ultra-low adherence 96-well Plate                              | Greiner Bio-One          | 650979       |
| <b>Small Molecules</b>                                         |                          |              |
| Name                                                           | Source                   | Catalog No.  |
| Y-27632 dihydrochloride                                        | Cayman Chemical          | 1000558310   |
| CHIR99021                                                      | Reprocell                | 04000402     |
| A8301                                                          | Sigma Aldrich            | SSML1314-1MG |
| DMH-1                                                          | Tocris                   | 4126/10      |
| IWP4                                                           | Tocris                   | 5214/10      |
| 8-bromoadenosine 3',5'-cyclic monophosphate sodium salt (cAMP) | Sigma Aldrich            | B7880        |
| 3-Isobutyl-1-methylxanthine (IBMX)                             | Sigma Aldrich            | I5879        |
| NSC668036                                                      | Tocris                   | 5813/10      |
| <b>Growth Factors</b>                                          |                          |              |
| Name                                                           | Source                   | Catalog No.  |
| Activin A                                                      | R&D Systems              | 338-AC-010   |
| Recombinant human BMP4                                         | R&D Systems              | 314-BP       |
| All-trans Retinoic Acid                                        | Cayman                   | 11017        |
| Recombinant human KGF                                          | PeptoTech                | 100-19       |
| Dexamethasone                                                  | Sigma Aldrich            | D4902        |

24  
25  
26  
27

28

### Supplementary Table 2: Media Recipes/Composition

| Media                          | Base               | Cytokines/Growth Factors | Final Concentration |
|--------------------------------|--------------------|--------------------------|---------------------|
| <b>Stage 1: Day 0 - 1</b>      | mTESR Plus         | CHIR99021                | 7 $\mu$ M           |
|                                |                    | Y27632                   | 10 $\mu$ M          |
| <b>Stage 1: Day 2 – 3</b>      | RPMI 1640          | Y27632                   | 10 $\mu$ M          |
|                                | B-27 minus insulin |                          |                     |
|                                | GlutaMAX (1x)      |                          |                     |
| <b>Stage 2: Day 4 – 7</b>      | RPMI 1640          | A8301                    | 1 $\mu$ M           |
|                                | B-27 complete      | IWP4                     | 5 $\mu$ M           |
|                                | GlutaMAX (1x)      | Y27632                   | 10 $\mu$ M          |
| <b>Stage 3: Day 8 – 14</b>     | RPMI 1640          | CHIR99021                | 3 $\mu$ M           |
|                                | B27 complete       | Retinoic acid            | 100 nM              |
|                                | GlutaMAX (1x)      |                          |                     |
| <b>Stage 4: Day 15 -17</b>     | RPMI 1640          | CHIR99021                | 3 $\mu$ M           |
|                                | B27 complete       | KGF                      | 10 ng/mL            |
|                                | GlutaMAX (1x)      | Dexamethasone            | 50 nM               |
|                                |                    | cAMP                     | 0.1 mM              |
|                                |                    | IBMX                     | 0.1 mM              |
| <b>Stage 4: Day 18 onwards</b> | RPMI 1640          | KGF                      | 10 ng/mL            |
|                                | B27 complete       | Dexamethasone            | 50 nM               |
|                                | GlutaMAX (1x)      | cAMP                     | 0.1 mM              |
|                                |                    | IBMX                     | 0.1 mM              |

29

30

### Supplementary Table 3: Reagents, equipment and probes for qPCR

| Reagents                                     |                          |               |
|----------------------------------------------|--------------------------|---------------|
| Name                                         | Source                   | Catalog No.   |
| TRIzol™ Reagent                              | Thermo Fisher Scientific | 15596018      |
| Chloroform                                   | Sigma-Aldrich            | C2432         |
| Glycoblue                                    | Thermo Fisher Scientific | AM9516        |
| Isopropanol                                  | ACROS Organic            | 327272500     |
| Ethanol 200 Proof                            | Pharmaco-AAPL            | DSP-C7-18     |
| High-Capacity cDNA Reverse Transcription kit | Applied Biosystems       | 4368814       |
| TaqMan Fast Advanced Master Mix              | Thermo Fisher Scientific | 4444556       |
| Equipment                                    |                          |               |
| Name                                         | Source                   | Catalog No.   |
| Nanodrop 2000 Spectrophotometer              | Thermo Fisher Scientific | ND2000CLAPTOP |
| EVOS FL Auto 2 Imaging System                | Thermo Fisher Scientific | AMAFD2000     |
| CFX96 Touch Real-Time PCR Detection System   | Bio-Rad                  | 1855196       |
| TaqMan Probes                                |                          |               |
| Description                                  | Assay ID                 |               |
| $\beta$ -actin                               | Hs01060665_g1            |               |
| NKX2.1                                       | Hs00968940_m1            |               |
| FOXA2                                        | Hs00232764_m1            |               |
| SOX17                                        | Hs00751752_s1            |               |
| NKX2.5                                       | Hs00231763_m1            |               |
| SFTPC                                        | Hs00161628_m1            |               |
| NCAM1                                        | Hs00941821_m1            |               |

31



32

#### Supplementary Table 4: Antibodies and Reagents for Immunostaining

| <b>Antibodies</b>                             |                             |               |          |
|-----------------------------------------------|-----------------------------|---------------|----------|
| Description                                   | Vendor                      | Catalog #/ID  | Dilution |
| Rabbit anti-NKX2.1                            | Abcam                       | ab76013       | 1:500    |
| Goat anti-NKX2.5                              | R&D Systems                 | AF2444        | 1:500    |
| Mouse anti-cTnT                               | Thermo Fisher Scientific    | MA5-12960     | 1:200    |
| Rabbit anti-MIXL1                             | Thermo Fisher Scientific    | PA5-64903     | 1:50     |
| Rabbit anti-NCAM1                             | Cell Signaling Technologies | 99746T        | 1:50     |
| Mouse anti-FOXA2                              | Santa Cruz Technology       | sc-271103     | 1:50     |
| Goat anti-SOX17                               | R&D Systems                 | AF1924        | 1:200    |
| Donkey anti-mouse IgG (H+L), Alexa Fluor 488  | Thermo Fisher Scientific    | A21202        | 1:500    |
| Donkey anti-rabbit IgG (H+L), Alexa Fluor 488 | Thermo Fisher Scientific    | A21206        | 1:500    |
| Donkey anti-rabbit IgG (H+L), Alexa Fluor 568 | Thermo Fisher Scientific    | A10042        | 1:500    |
| Donkey anti-goat IgG (H+L), Alexa Fluor 647   | Thermo Fisher Scientific    | A21447        | 1:500    |
| <b>Reagents</b>                               |                             |               |          |
| Description                                   | Vendor                      | Catalog #/ID  |          |
| Methanol                                      | Fisher Chemical             | BPA412-1      |          |
| Paraformaldehyde                              | Sigma Aldrich               | P6148-500G    |          |
| Triton X-100                                  | Sigma Aldrich               | X100-500ML    |          |
| Bovine Serum Albumin                          | Fisher BioReagents          | BP9706-100    |          |
| Phosphate Buffer Saline 20X                   | Growcells                   | MRGF-695-010L |          |
| Histoclear                                    | Great Lakes                 | GL-1100-01    |          |
| Antigen Unmasking Solution, Citric Acid Based | Vector Laboratories         | H-3300        |          |
| ImmEdge® Hydrophobic Barrier PAP Pen          | Vector Laboratories         | H-4000        |          |
| DAPI-Fluoromount-G                            | Southern Biotech            | 0100-20       |          |
| HistoGel™ Specimen Processing Gel             | Richard Allen Scientific    | 11330057      |          |
| Hoechst 33342                                 | Thermo Fisher Scientific    | 62249         |          |

33

34

35

36

37

38

39

40

41

42

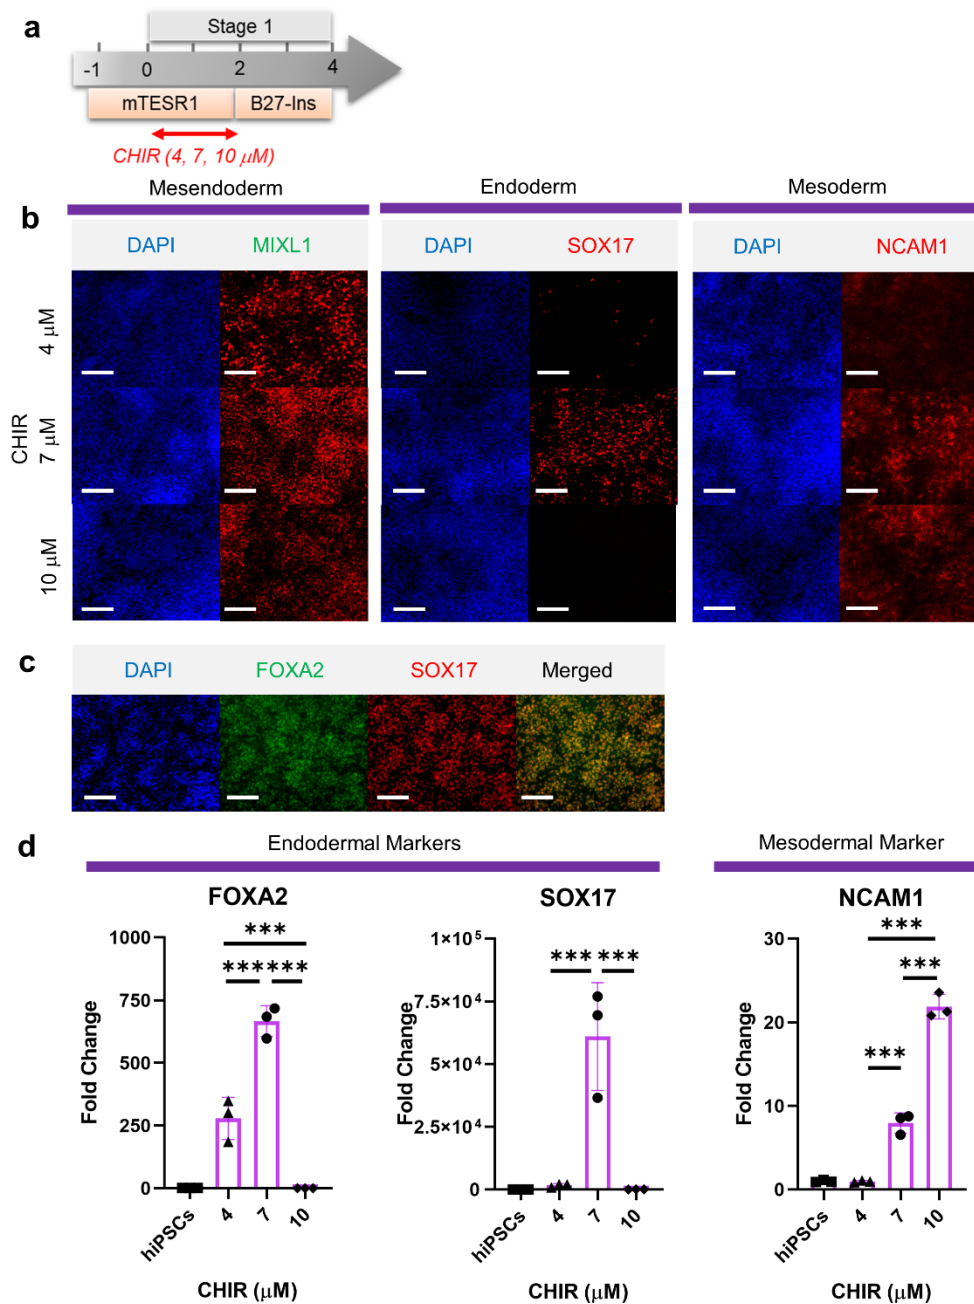

43  
44

**Supplementary Fig. 1: Mesoderm and endoderm co-induction from hPSCs using CHIR.** (a) Diagram showing the experimental design. (b) Cells following Stage-1 differentiation expressed MIXL1 (Mesendodermal lineage), SOX17 (definitive endoderm), and NCAM1 (mesoderm). (c) Majority of SOX17 cells were also FOXA2<sup>+</sup>. (d) Fold change of hPSCs for FOXA2 (n = 3 each; 4 vs. 7, p < 0.001; 7 vs. 10, p < 0.001; 4 vs. 10, p < 0.001), SOX17 (n = 3 each; 4 vs. 7, p < 0.001; 7 vs. 10, p < 0.001; 4 vs. 10, p = 0.9978) and NCAM1 (n = 3 each; 4 vs. 7, p < 0.001; 7 vs. 10, p < 0.001; 4 vs. 10, p < 0.001). Scale bar = 125 μm for 20X images. All data are mean ± SD. \*p < 0.05; \*\*p < 0.01; \*\*\*p < 0.001.

51

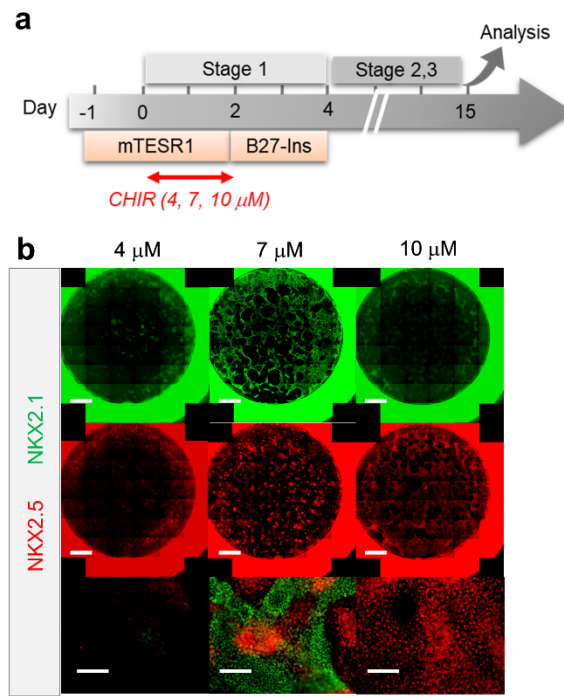

**Supplementary Fig. 2: Verification of cardio-pulmonary co-differentiation protocol on BU1 hiPSCs.** (a) Schematic diagram illustrating the process of cardio-pulmonary co-differentiation, highlighting the adjustment of CHIR concentration during the first 2 days of differentiation. (b) IF staining of NKX2.1 and NKX2.5 following 15 days of co-differentiation. Scale bar = 500  $\mu$ m for whole well scan; Scale bar = 125  $\mu$ m for 20X images.

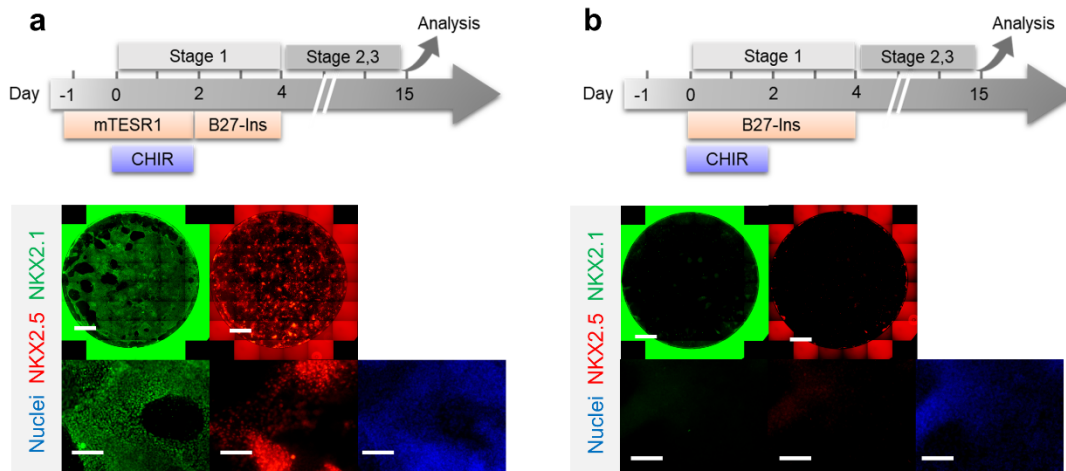

**Supplementary Fig. 3: Initial co-induction medium for CHIR-directed differentiation.** Cells were induced by CHIR in (a) mTESR1 (b) and RPMI-based medium, followed by representative IF staining of NKX2.1 and NKX2.5 following 15 days of differentiation. Scale bar = 500  $\mu$ m for whole well scan; Scale bar = 125  $\mu$ m for 20X images.

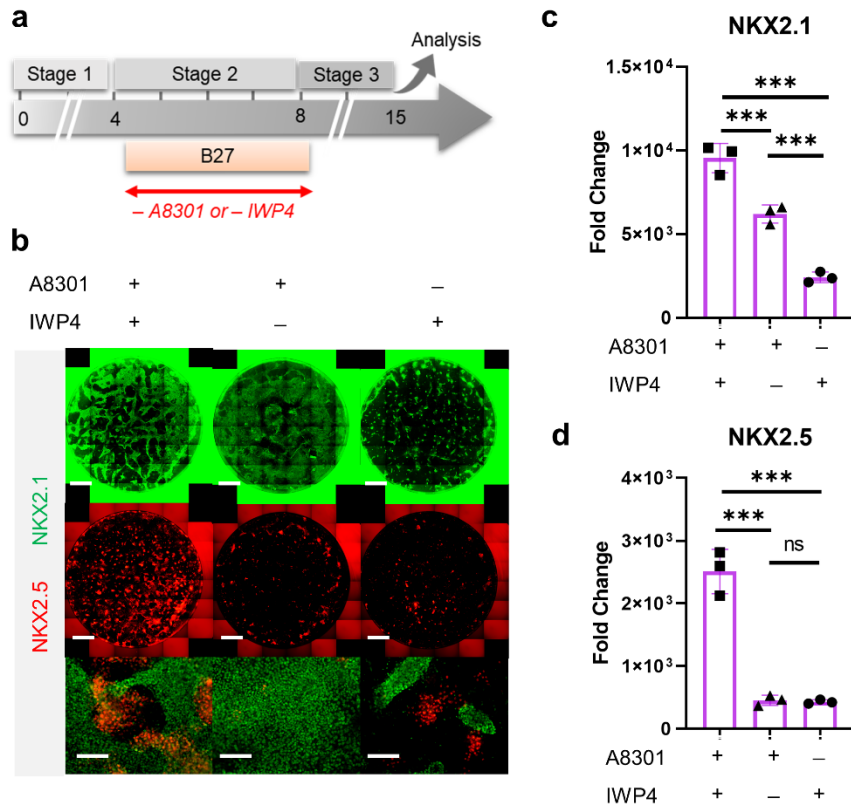

71  
72 **Supplementary Figure 4: Combination of TGF- $\beta$  and WNT inhibition during Stage-2 of co-differentiation**  
73 **is required for cardio-pulmonary induction.** (a) Schematic diagram illustrating the experimental design. (b-d)  
74 IF staining showing NKX2.1 and NKX2.5 expression on Day 15 of differentiation (b), and the corresponding  
75 qPCR analysis of (c) NKX2.1 (n = 3 each; A8301<sup>+</sup>/IWP4<sup>+</sup> vs. A8301<sup>+</sup>/IWP4<sup>-</sup>, p < 0.001; A8301<sup>+</sup>/IWP4<sup>+</sup> vs.  
76 A8301<sup>-</sup>/IWP4<sup>+</sup>, p < 0.001; A8301<sup>+</sup>/IWP4<sup>-</sup> vs. A8301<sup>-</sup>/IWP4<sup>+</sup>, p < 0.001) and (d) NKX2.5 (n = 3 each; A8301<sup>+</sup>  
77 /IWP4<sup>+</sup> vs. A8301<sup>+</sup>/IWP4<sup>-</sup>, p < 0.001; A8301<sup>+</sup>/IWP4<sup>+</sup> vs. A8301<sup>-</sup>/IWP4<sup>+</sup>, p < 0.001; A8301<sup>+</sup>/IWP4<sup>-</sup> vs. A8301<sup>-</sup>  
78 /IWP4<sup>+</sup>, p = 0.9986). Scale bar = 500  $\mu$ m for whole well scan; Scale bar = 125  $\mu$ m for 20X images. All data are  
79 mean  $\pm$  SD. \*p < 0.05; \*\*p < 0.01; \*\*\*p < 0.001.

71  
72  
73  
74  
75  
76  
77  
78  
79  
80  
81



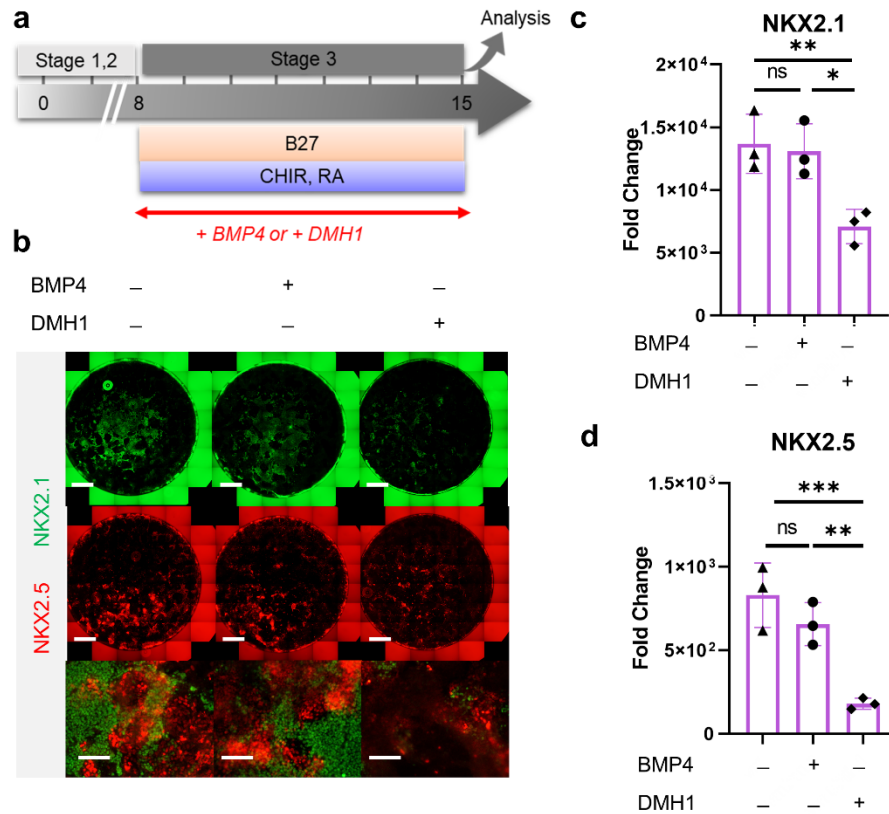

**Supplementary Figure 5: Roles of BMP4 during Stage-3 of co-differentiation.** (a) Schematic diagram illustrating the experimental design. (b) IF staining showing NKX2.1 and NKX2.5 expression on Day 15 of differentiation, and the corresponding qPCR analysis of (c) NKX2.1 (n = 3 each; BMP4<sup>-</sup>/DMH1<sup>-</sup> vs. BMP4<sup>+</sup>/DMH1<sup>-</sup>, p > 0.05; BMP4<sup>-</sup>/DMH1<sup>-</sup> vs. BMP4<sup>-</sup>/DMH1<sup>+</sup>, p < 0.01; BMP4<sup>+</sup>/DMH1<sup>-</sup> vs. BMP4<sup>-</sup>/DMH1<sup>+</sup>, p = 0.9737) and (d) NKX2.5 (n = 3 each; BMP4<sup>-</sup>/DMH1<sup>-</sup> vs. BMP4<sup>+</sup>/DMH1<sup>-</sup>, p = 0.3330; BMP4<sup>-</sup>/DMH1<sup>-</sup> vs. BMP4<sup>-</sup>/DMH1<sup>+</sup>, p < 0.001; BMP4<sup>+</sup>/DMH1<sup>-</sup> vs. BMP4<sup>-</sup>/DMH1<sup>+</sup>, p < 0.01). Scale bar = 500 μm for whole well scan; Scale bar = 125 μm for 20X images. All data are mean ± SD. \*p < 0.05; \*\*p < 0.01; \*\*\*p < 0.001.

82  
83  
84  
85  
86  
87  
88  
89  
90  
91  
92  
93  
94  
95

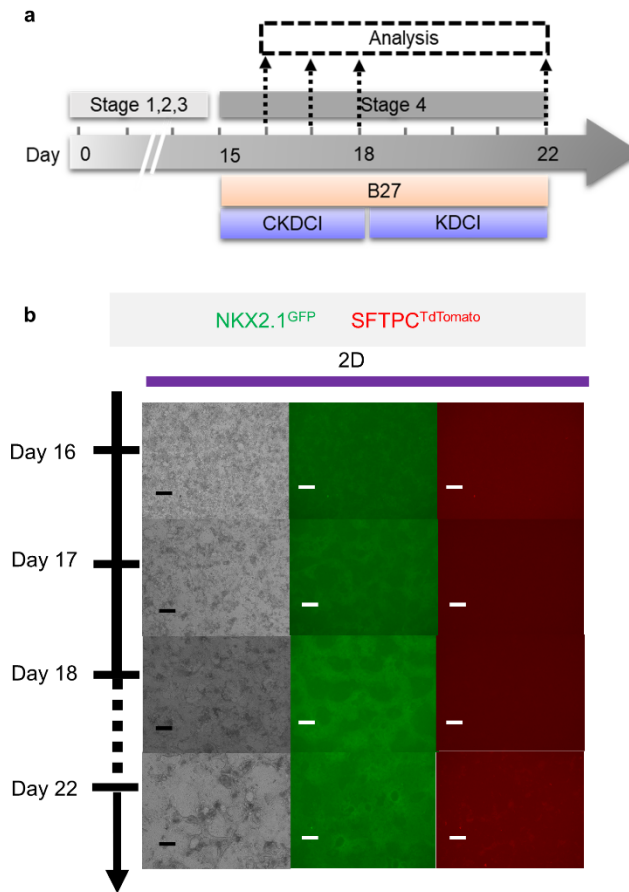

96  
97 **Supplementary Fig. 6: Co-maturation of Day 15 cardiac and pulmonary progenitors on 2D submerged**  
98 **culture.** (a) Schematic diagram showing the experimental design. (b) Live cell imaging of the NKX2.1<sup>GFP</sup> and  
99 SFTPC<sup>TdTomato</sup> reporter signal over time. Scale bar = 125  $\mu$ m for 10X images.

96  
97  
98  
99  
00  
01  
02  
03  
04  
05  
06  
07  
08  
09  
10

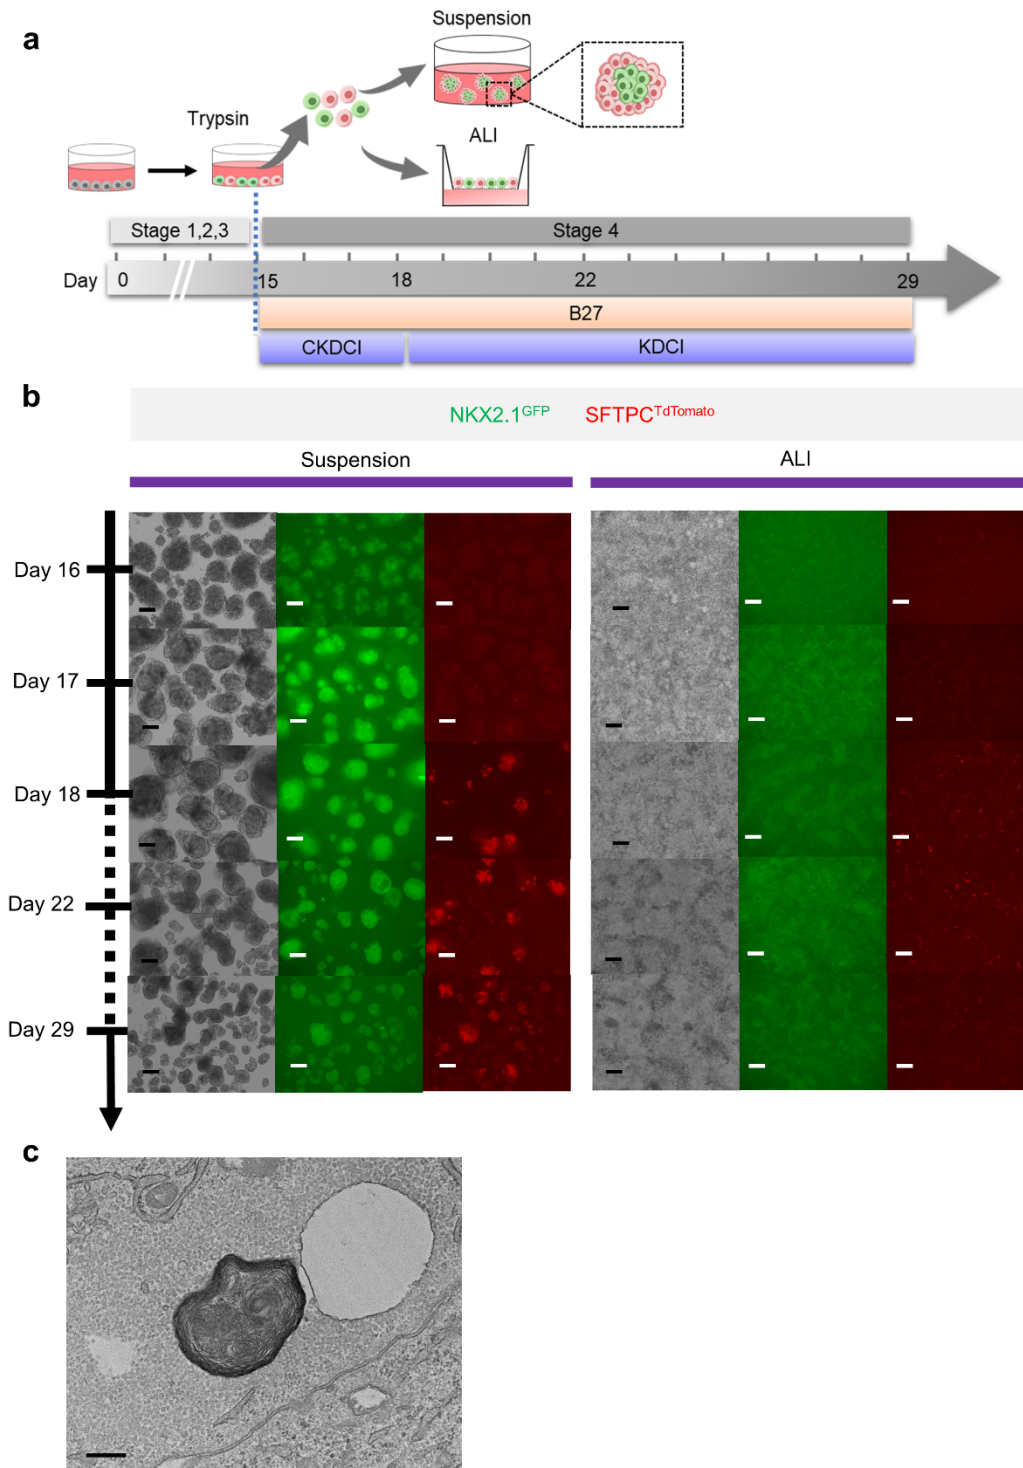

11  
12 **Supplementary Fig. 7: Co-maturation of Day 15 cardiac and pulmonary progenitors on ALI and 3D**  
13 **suspension culture platforms.** (a) Schematic diagram showing the experimental design. (b) Live cell/organoid  
14 imaging on the NKX2.1<sup>GFP</sup> and SFTPC<sup>Tdtomato</sup> reporter signal over time. Scale bar = 125  $\mu$ m for 10X images. (c)  
15 Transmission electron microscopy (TEM) image of the lamellar body of AT2 cells following alveolar maturation  
16 in 3D suspension culture, scale: 400 nm.

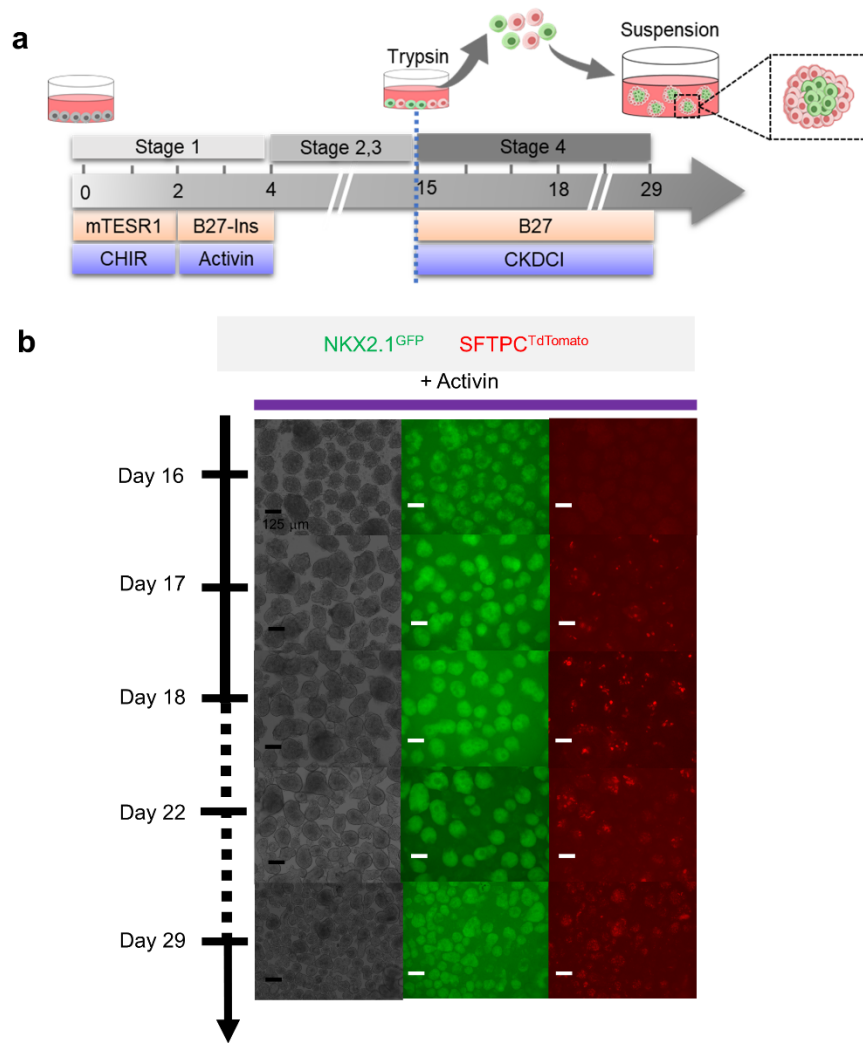

17  
18  
19 **Supplementary Fig. 8: Maturation of pulmonary progenitors derived from Activin A-based protocol on**  
20 **3D suspension culture.** (a) Schematic diagram showing the experimental design. (b) Live organoid imaging on  
21 the NKX2.1<sup>GFP</sup> and SFTPC<sup>TdTomato</sup> reporter signal over time. Scale bar = 125  $\mu$ m for 10X images.  
22  
23

24 **Supplementary Video 1:** Contacting cardiac  $\mu$ T following 7 days after withdrawal of CHIR.

25  
26 **Supplementary Video 2:** Calcium influx capability of cardiac  $\mu$ T loaded with Cal-520.  
27
